# Supplementary material for: Global, Regional, National Burden of leprosy, 1990-2021: A Systematic Analysis for the Global Burden of Disease Study 2021 and forecast to 2040
Source: Research Square preprint supplement (doi:10.21203/rs.3.rs-7587994/v1), 2025-09-24
Supplement: Supplementary file 1 [file 878aae75ed0d5a8e38a6bd70.docx]

**Supplementary Appendix**

**Contents**

[Appendix 1 Overview of data processing workflow and methodological enhancements in GBD 2021 3](#_Toc197279086)

[Appendix 2 List of International Classification of Diseases (ICD) codes mapped to leprosy in GBD 2021 7](#_Toc197279087)

[Table S1 Prevalence of leprosy in 1990 and 2021 by 204 Countries and territories. 8](#_Toc197279088)

[Table S2 Incidence of leprosy in 1990 and 2021 by 204 Countries and territories 21](#_Toc197279089)

[Table S3 DALYs (Disability-Adjusted Life Years) of leprosy in 1990 and 2021 by 204 Countries and territories 35](#_Toc197279090)

[Table S4 Age-standardized Prevalence rates of leprosy with slope index of inequality and concentration index analysis by global 41](#_Toc197279091)

[Table S5 Age-standardized DALYs rates of leprosy with slope index of inequality and concentration index analysis by global 41](#_Toc197279092)

[Table S6 Age-standardized DALYs rates of leprosy with slope index of inequality and concentration index analysis by global 41](#_Toc197279093)

## Appendix 1 Overview of data processing workflow and methodological enhancements in GBD 2021

In GBD 2021, the workflow for data processing plays a critical role in guaranteeing the precision and uniformity of global disease burden estimates. This stage involves systematic modifications to epidemiological data to address biases stemming from variations in data sources, definitions, and measurement techniques. To achieve this, sophisticated statistical models like MR-BRT and DisMod-MR 2.1 are utilized, which enhance the internal consistency of estimates related to incidence, prevalence, years lived with disability (YLDs), years of life lost (YLLs), and disability-adjusted life years (DALYs) across various regions, age groups, genders, and time periods. The overarching goal of this process is to reduce variability in study outcomes through careful standardization and correction measures.

**1. Identification and extraction of data**

In GBD 2021, the assessment of nonfatal disease burden starts with a thorough identification and extraction of a variety of data sources. This involves comprehensive systematic reviews of 77 diseases and associated risk factors, alongside gathering essential information from surveys, disease registries, case reports, and hospitalization statistics. A significant component of this process is the survey data acquired from the Global Health Data Exchange (GHDx), particularly the Demographic and Health Surveys (DHS), which provide insights into numerous health outcomes among varied populations and regions. The calculation of DALYs for GBD 2021 relies on 100,983 data sources, with 19,189 being incorporated in 2021 alone. Out of these, 75,459 pertain to nonfatal causes and encompass metrics such as incidence and prevalence, along with other epidemiological indicators. For fatality assessments, data is drawn from death registrations, verbal autopsies, registries, surveys, and police or surveillance data, ensuring coverage of all nations and regions worldwide. The GBD initiative involved systematic reviews, active data collection efforts, and collaboration with a global network of contributors to maximize the inclusion of diverse data globally.

**2. Data processing and heterogeneity control**

In GBD 2021, modifications were applied to epidemiological data recognized to contain biases, particularly those arising from different case definitions or measurement methodologies. These modifications utilized correction factors derived from MR-BRT (Meta-regression—Bayesian, regularized, trimmed), which encompasses a range of statistical models, including both linear and nonlinear mixed-effects frameworks. The input for MR-BRT included paired estimates corresponding to two distinct case definitions or measurement approaches for the same age group, sex, region, and year. Furthermore, MR-BRT addressed heterogeneity through network meta-regression and facilitated sex-specific and age-sex-specific adjustments for data not reported by these categories. This meticulous approach fostered data standardization and consistency, thereby mitigating heterogeneity brought about by disparate data sources and definitions. Additionally, information spanning over 25 years was refined into more precise age-specific estimates by applying alternative age distribution patterns derived from other existing data sources.

**3. Epidemiological estimation and DLAYs calculation**

Estimates for the prevalence and incidence of various diseases and injuries were calculated using DisMod-MR 2.1 (Disease Modeling Meta-Regression Tool, version 2.1). This Bayesian modeling tool produces consistent estimates of prevalence, incidence, remission, and mortality, categorized by sex, region, year, and age group. In instances where original epidemiological data is unavailable, DisMod-MR 2.1 employs prior information from higher hierarchical levels to derive parameters for lower levels. Additionally, for specific causes, the Space-Time Gaussian Process Regression (ST-GPR) model served as an alternative methodology for estimation. For nonfatal conditions, prevalence and incidence estimates were further broken down into specific sequelae based on severity. Sequelae for nonfatal conditions can range from asymptomatic to severe, contingent on the disease. For the majority of nonfatal conditions, the distribution of cases across sequelae categories was determined using analysis from the Medical Expenditure Panel Survey (MEPS). Crude years lived with disability (YLD) rates were calculated by multiplying the prevalence for each sequela by the relevant disability weights.

**4. Comorbidity adjustment**

In GBD 2021, adjustments were made to Disability-Adjusted Life Years (DALYs) for comorbid conditions to consider the presence of multiple nonfatal causes within the population, enabling additive DALYs within the cause hierarchy. The estimation of comorbidities was performed using simulations of 20,000 hypothetical individuals across various age groups, sexes, regions, and years. Each simulated individual received probabilities of having each sequela based on its prevalence rates. After this assignment, a cumulative disability weight was calculated for each individual by multiplying the disability weights associated with all assigned sequelae, ensuring that necessary adjustments were made to the disability weights specific to each sequela.

**5. DALYs estimation process**

In GBD 2021, the calculation of Years of Life Lost (YLLs) involved multiplying the estimated number of deaths by the standard life expectancy at the age of death, categorized by age, sex, region, and year. To accurately assign causes of death, the study followed the guidelines established in the 11th edition of the International Classification of Diseases (ICD-11), matching each death to the underlying cause that triggered the series of events leading to that outcome. For deaths recorded with vague, unreliable, or intermediate cause codes, reallocation algorithms were used to reassign these "garbage codes" to the most likely causes of death. These algorithms were based on published research, expert consultations, and regression-based adjustments from datasets that recorded multiple causes of death.

The Cause of Death Ensemble model (CODEm) was used to estimate mortality for most diseases and injuries. CODEm incorporates a variety of statistical models that rigorously evaluate the predictive accuracy of different combinations of covariates, integrating the findings to estimate deaths from specific causes based on location, age, sex, and year. For a limited number of causes that had sparse data or underwent major changes in reporting practices, GBD 2021 utilized tailored modeling approaches. These included the incorporation of prevalence, incidence, case fatality rates, or information on sub-causes to deduce causes of death. This methodology enhanced the management of data heterogeneity and reduced uncertainty in estimates.

To compute Disability-Adjusted Life Years (DALYs) for GBD 2021, YLLs were summed with Years Lived with Disability (YLDs). It was assumed that the uncertainty surrounding YLLs was independent of that for YLDs. By aggregating the initial series of YLLs and YLDs across 500 simulations and repeating this for additional simulations, the 95% uncertainty interval for DALYs was ultimately determined. The estimation process comprehensively addressed all causes, locations, age groups, sexes, and years, offering a thorough evaluation of the global health burden.

**6. Uncertainty and heterogeneity analysis**

GBD 2021 included extensive uncertainty analysis to ensure the robustness of the estimates. By generating multiple simulations (usually 500) for each population group, accounting for uncertainties in prevalence and DWs, and reporting 95% uncertainty intervals, GBD 2021 provided reliable ranges for disease burden estimates. Additionally, GBD 2021 addressed heterogeneity by adjusting for known biases in the data, ensuring that changes in estimates reflected actual differences in disease burden rather than inconsistencies in data sources. This rigorous approach to uncertainty and heterogeneity analysis is crucial for making health policy decisions based on GBD results.

**7. Data release and application**

The results of GBD 2021 were shared using multiple platforms, such as scientific journals, interactive visualization tools, and the Global Health Data Exchange (GHDx). These resources allow researchers, policymakers, and the general public to examine and compare health data across various regions and over different time frames. The primary objective of GBD 2021 is to establish a thorough framework for understanding health trends on both global and local scales, thus facilitating evidence-based decision-making and the efficient distribution of public health resources.

**8. New Additions in GBD 2021**

In GBD 2021, estimates for all age groups under five years were further divided into specific categories: 0-6 days, 7-27 days, 1-5 months, 6-11 months, 12-23 months, and 2-4 years. Additionally, for the first time, GBD 2021 reported five new Level 3 causes and five additional Level 4 causes. The modeling and reporting of these new causes took into account data availability, policy issues, research priorities, and advancements in methodologies. Notably, COVID-19-related causes were included for the first time, which encompassed the burden of long COVID and other outcomes linked to the pandemic. To more accurately reflect the pandemic's impact, prevalence estimates for severe depression and anxiety were adjusted accordingly.This extensive approach ensured that GBD 2021 maintained scientific rigor and offered globally comparable disease burden estimates, thereby establishing a dependable basis for global health policy and planning by addressing heterogeneity and uncertainty. The advanced methodologies and robust modeling techniques utilized in GBD 2021 demonstrate the high standards and precision required to tackle global health issues effectively.

## Appendix 2 List of International Classification of Diseases (ICD) codes mapped to leprosy in GBD 2021

| **Cause** | **ICD-10** | **ICD-9** |
| --- | --- | --- |
| Leprosy | A30-A30.9, B92 | 030-030.9, V74.2 |

## Table S1 Prevalence of leprosy in 1990 and 2021 by 204 Countries and territories.

A

|  | 1990 | |  | 2021 | |  | 1990-2021 |
| --- | --- | --- | --- | --- | --- | --- | --- |
| **Countries and territories** | **Prevalent cases No. *102 (95% UI)** | **ASPR per 100,000 No. (95% UI)** |  | **Prevalent cases No. *102 (95% UI)** | **ASPR per 100,000 No. (95% UI)** | | **EAPC of ASPR No. (95% CI)** |
| Republic of Uganda | 12.4 [10.59-14.52] | 13.76 [11.71-16.17] |  | 9.37 [7.87-11.13] | 4.04 [3.38-4.78] |  | -4.04 [-4.34 to -3.73] |
| Independent State of Papua New Guinea | 6.13 [5.22-7.13] | 23.56 [20.12-27.46] |  | 9.01 [7.88-10.43] | 12.14 [10.7-13.91] |  | -2.09 [-2.14 to -2.04] |
| People's Republic of Bangladesh | 262.28 [228.57-303.17] | 40.81 [35.51-46.97] |  | 84.48 [72.73-98.32] | 5.5 [4.74-6.38] |  | -6.37 [-6.47 to -6.27] |
| Federal Democratic Republic of Ethiopia | 145.88 [124.87-171.73] | 54.26 [46.16-64.16] |  | 81.99 [71.14-95.27] | 12.55 [10.8-14.64] |  | -4.93 [-5.1 to -4.76] |
| Republic of Chad | 8.23 [6.97-9.63] | 23.92 [20.23-27.94] |  | 8.9 [7.77-10.2] | 10.47 [9.24-11.92] |  | -2.77 [-3.26 to -2.27] |
| Republic of Kenya | 4.02 [3.32-4.84] | 3.32 [2.78-3.97] |  | 8.76 [7.19-10.55] | 2.63 [2.19-3.14] |  | -0.42 [-0.55 to -0.28] |
| Bolivarian Republic of Venezuela | 9.57 [8.23-11.2] | 7.4 [6.39-8.61] |  | 8.56 [7.37-9.91] | 2.87 [2.48-3.31] |  | -2.92 [-3.16 to -2.68] |
| United Mexican States | 5.72 [4.59-6.98] | 1.03 [0.84-1.25] |  | 8.5 [6.77-10.41] | 0.64 [0.51-0.78] |  | -1.44 [-1.62 to -1.27] |
| Republic of Ghana | 11.45 [9.89-13.31] | 12.94 [11.23-14.9] |  | 8.14 [6.79-9.56] | 3.44 [2.88-3.97] |  | -4.01 [-4.11 to -3.91] |
| People's Republic of China | 151.83 [123.83-183.53] | 1.48 [1.22-1.78] |  | 75.94 [59.43-94.84] | 0.4 [0.31-0.5] |  | -4.59 [-4.78 to -4.4] |
| Republic of Guinea | 14.26 [12.41-16.43] | 36.74 [31.91-42.53] |  | 7.64 [6.7-8.77] | 9.88 [8.7-11.19] |  | -3.97 [-4.41 to -3.52] |
| Republic of Benin | 9.01 [7.68-10.55] | 34.7 [29.55-40.88] |  | 7.19 [6.22-8.4] | 9.51 [8.24-11.07] |  | -4.18 [-4.74 to -3.61] |
| Federative Republic of Brazil | 441.11 [384.9-504.46] | 39.37 [34.31-45.09] |  | 692.83 [597.94-796.92] | 27.68 [23.92-31.78] |  | -0.98 [-1.19 to -0.76] |
| Democratic Republic of the Congo | 130.72 [111.9-150.56] | 61.06 [52.49-70.24] |  | 66.97 [58.61-77.3] | 12.33 [10.87-14.01] |  | -5.04 [-5.76 to -4.32] |
| Republic of Burundi | 9.41 [8.03-11.03] | 30.29 [25.65-35.63] |  | 6.95 [6.03-7.96] | 9.27 [8.05-10.59] |  | -3.61 [-4.03 to -3.19] |
| Republic of Cameroon | 7.37 [6.25-8.63] | 12.27 [10.44-14.31] |  | 6.89 [5.83-8.17] | 3.59 [3.07-4.21] |  | -4.13 [-4.47 to -3.78] |
| Kingdom of Cambodia | 13.73 [11.89-16.01] | 22.26 [19.2-25.91] |  | 6.72 [5.67-7.87] | 4.48 [3.79-5.23] |  | -5.5 [-5.81 to -5.2] |
| Republic of Senegal | 10.03 [8.55-11.66] | 23.71 [20.11-27.72] |  | 6.51 [5.6-7.65] | 6.27 [5.43-7.31] |  | -4.11 [-4.25 to -3.96] |
| Republic of Malawi | 11.57 [9.86-13.7] | 21.47 [18.28-25.26] |  | 6.49 [5.58-7.57] | 5.77 [4.99-6.68] |  | -4.13 [-4.35 to -3.91] |
| Islamic Republic of Pakistan | 42.47 [35.97-50.45] | 5.86 [4.98-6.9] |  | 55.51 [46-66.68] | 3.27 [2.71-3.92] |  | -2.22 [-2.4 to -2.04] |
| Islamic Republic of Iran | 1.66 [1.28-2.12] | 0.49 [0.38-0.61] |  | 5.88 [4.54-7.41] | 0.66 [0.51-0.82] |  | 1.82 [1.17 to 2.48] |
| Republic of Sierra Leone | 9.23 [8.06-10.58] | 35.55 [30.92-41.02] |  | 5.59 [4.89-6.44] | 10.31 [9.01-11.89] |  | -3.91 [-4.47 to -3.36] |
| Republic of Yemen | 4.95 [4.29-5.74] | 6.99 [6.06-8.05] |  | 5.37 [4.61-6.28] | 2.51 [2.15-2.94] |  | -3.54 [-3.8 to -3.29] |
| Argentine Republic | 6.08 [5.19-7.04] | 1.89 [1.61-2.19] |  | 5.17 [4.39-6.11] | 0.99 [0.84-1.17] |  | -1.57 [-1.75 to -1.4] |
| Republic of Cuba | 6.69 [5.68-7.8] | 6.26 [5.33-7.29] |  | 5.04 [4.3-5.89] | 3.09 [2.63-3.59] |  | -2.13 [-2.36 to -1.9] |
| Malaysia | 6.11 [5.06-7.25] | 4.74 [4-5.58] |  | 5.04 [4.14-6.15] | 1.58 [1.3-1.91] |  | -3.65 [-3.81 to -3.49] |
| Republic of the Union of Myanmar | 112.59 [98.05-130.46] | 38.71 [33.4-44.76] |  | 48.87 [42.82-55.86] | 9.07 [7.94-10.31] |  | -4.8 [-5.18 to -4.43] |
| Republic of the Philippines | 22.29 [19.18-26.08] | 5.24 [4.55-6.08] |  | 40.85 [35.21-47.64] | 4.08 [3.52-4.74] |  | -0.74 [-0.78 to -0.7] |
| Republic of Madagascar | 36.1 [31.34-41.63] | 52.8 [45.53-60.54] |  | 40 [35.75-44.34] | 23.89 [21.64-26.19] |  | -2.59 [-3.05 to -2.14] |
| Republic of Kazakhstan | 4.74 [3.9-5.75] | 3.25 [2.71-3.86] |  | 4.82 [3.98-5.87] | 2.51 [2.08-3.05] |  | -1.23 [-1.53 to -0.93] |
| Central African Republic | 8.76 [7.51-10.26] | 55.3 [47.29-65.18] |  | 4.23 [3.61-5] | 12.65 [10.79-14.87] |  | -5.23 [-5.88 to -4.58] |
| Republic of Liberia | 6.88 [5.93-8.04] | 47.57 [40.74-55.94] |  | 4.12 [3.65-4.73] | 12.05 [10.69-13.74] |  | -4.88 [-5.06 to -4.7] |
| Republic of South Africa | 3.29 [2.61-4.11] | 1.26 [1.01-1.56] |  | 4.05 [3.18-5.05] | 0.76 [0.59-0.93] |  | -1.77 [-1.9 to -1.63] |
| Republic of Mozambique | 48.91 [42.79-56.57] | 61.24 [53.58-70.45] |  | 37.93 [34.17-41.72] | 23.05 [21.03-25.24] |  | -3.42 [-3.79 to -3.05] |
| United Republic of Tanzania | 39.42 [33.92-46.07] | 27.16 [23.23-31.68] |  | 35.74 [31.5-41.19] | 9.9 [8.72-11.25] |  | -2.63 [-3.12 to -2.13] |
| Republic of Indonesia | 247.68 [214.14-287.12] | 18.73 [16.2-21.76] |  | 340.45 [295.92-395.86] | 12.07 [10.5-13.99] |  | -0.87 [-1.1 to -0.63] |
| Federal Democratic Republic of Nepal | 110.29 [99.73-124.23] | 86.34 [77.7-96.52] |  | 32.16 [28.71-36.13] | 11.93 [10.67-13.38] |  | -6.67 [-6.94 to -6.39] |
| Republic of Mali | 7.09 [6.2-8.12] | 13.65 [11.98-15.61] |  | 3.91 [3.27-4.65] | 3.01 [2.54-3.52] |  | -4.86 [-4.95 to -4.78] |
| Togolese Republic | 3.81 [3.19-4.5] | 20.53 [17.36-23.82] |  | 3.6 [3.09-4.16] | 6.55 [5.64-7.61] |  | -3.63 [-3.98 to -3.29] |
| Republic of Zambia | 5.36 [4.62-6.3] | 12.85 [11.02-14.88] |  | 3.48 [2.91-4.12] | 3.03 [2.56-3.57] |  | -4.87 [-5.39 to -4.34] |
| Republic of Korea | 5.3 [4.22-6.56] | 1.39 [1.12-1.71] |  | 3.41 [2.59-4.33] | 0.43 [0.32-0.54] |  | -3.94 [-4.39 to -3.48] |
| Dominican Republic | 4.03 [3.49-4.68] | 8.34 [7.22-9.64] |  | 3.25 [2.79-3.78] | 3.03 [2.61-3.52] |  | -2.85 [-3.27 to -2.42] |
| Republic of the Congo | 7.3 [6.21-8.45] | 51.52 [43.88-59.45] |  | 3.14 [2.69-3.67] | 8.06 [6.91-9.42] |  | -6.32 [-6.72 to -5.92] |
| Republic of Guatemala | 4.57 [3.77-5.44] | 9.96 [8.24-11.9] |  | 3.03 [2.43-3.75] | 2.38 [1.92-2.92] |  | -4.27 [-4.74 to -3.8] |
| Democratic Socialist Republic of Sri Lanka | 37.99 [33.21-43.91] | 27.66 [24.03-31.89] |  | 28.17 [25.1-32.01] | 10.97 [9.8-12.49] |  | -2.52 [-2.66 to -2.38] |
| Socialist Republic of Viet Nam | 41.74 [35.19-49.08] | 8.69 [7.34-10.17] |  | 26.43 [21.55-32.08] | 2.46 [2.01-2.97] |  | -4.17 [-4.27 to -4.06] |
| Kingdom of Thailand | 32.78 [27.58-39.13] | 7.07 [5.95-8.33] |  | 21.01 [17.16-25.23] | 2.21 [1.8-2.65] |  | -3.87 [-4 to -3.75] |
| Lao People's Democratic Republic | 8.17 [6.94-9.57] | 31.16 [26.45-36.29] |  | 2.97 [2.53-3.53] | 4.97 [4.25-5.85] |  | -5.95 [-6.13 to -5.77] |
| Republic of Haiti | 5.48 [4.62-6.45] | 13.45 [11.25-15.77] |  | 2.62 [2.14-3.18] | 2.73 [2.24-3.28] |  | -4.83 [-5.2 to -4.45] |
| United Arab Emirates | 0.91 [0.78-1.09] | 7.13 [6.12-8.29] |  | 2.32 [1.94-2.76] | 2.05 [1.74-2.39] |  | -3.69 [-3.9 to -3.48] |
| Democratic Republic of Timor-Leste | 2.8 [2.42-3.28] | 60.69 [51.97-70.65] |  | 2.04 [1.78-2.33] | 20.15 [17.62-22.92] |  | -3.99 [-4.53 to -3.45] |
| Republic of India | 2944.65 [2570.59-3398.96] | 47.84 [41.87-55.14] |  | 1910.21 [1654.28-2209.08] | 14.09 [12.25-16.27] |  | -3.72 [-3.9 to -3.53] |
| Republic of C么te d'Ivoire | 20.17 [17.09-23.52] | 31.85 [26.85-37.37] |  | 16.97 [14.85-19.42] | 10.05 [8.84-11.37] |  | -2.99 [-3.38 to -2.59] |
| Republic of Angola | 45.48 [39.22-52.49] | 79.35 [68.24-91.95] |  | 16.84 [14.51-19.38] | 9.39 [8.14-10.68] |  | -7.08 [-7.58 to -6.58] |
| Republic of South Sudan | 19.29 [16.46-22.82] | 57.97 [49.07-68.27] |  | 16.13 [13.78-18.15] | 29.26 [25.21-32.83] |  | -0.89 [-1.46 to -0.31] |
| Federal Republic of Somalia | 8.11 [6.94-9.6] | 20.06 [16.93-23.62] |  | 12.81 [11.2-14.49] | 12.19 [10.73-13.68] |  | -1.42 [-1.78 to -1.06] |
| Republic of Sudan | 19.96 [17.09-23.34] | 16.68 [14.13-19.41] |  | 12.52 [10.9-14.41] | 4.38 [3.8-5.01] |  | -3.18 [-4.14 to -2.2] |
| Republic of the Niger | 15.05 [12.88-17.64] | 37.03 [31.81-43.45] |  | 11.6 [10.07-13.43] | 9.57 [8.3-11.03] |  | -4.57 [-4.94 to -4.2] |
| Arab Republic of Egypt | 17.03 [14.68-19.7] | 4.59 [3.99-5.29] |  | 11.25 [9.46-13.34] | 1.36 [1.15-1.61] |  | -3.44 [-3.72 to -3.17] |
| Republic of Colombia | 15.42 [12.99-18.03] | 6.74 [5.64-7.91] |  | 11.03 [9.21-12.79] | 2.02 [1.69-2.34] |  | -3.61 [-3.84 to -3.37] |
| Federal Republic of Nigeria | 94.25 [81.53-109.67] | 16.52 [14.26-19.16] |  | 106.68 [91.96-124.93] | 7.79 [6.67-9.08] |  | -2.55 [-2.75 to -2.34] |
| Burkina Faso | 15.18 [13.14-17.54] | 27.97 [24.16-32.32] |  | 10.97 [9.54-12.77] | 8.41 [7.35-9.75] |  | -3.84 [-4.01 to -3.67] |
| Republic of Paraguay | 9.1 [7.89-10.52] | 33.31 [28.73-38.75] |  | 10.08 [8.89-11.4] | 15.38 [13.6-17.41] |  | -2.33 [-2.43 to -2.22] |
| Plurinational State of Bolivia | 3.84 [3.3-4.45] | 9.27 [7.93-10.83] |  | 1.81 [1.53-2.13] | 1.72 [1.45-2.02] |  | -5.46 [-5.71 to -5.2] |
| Republic of Zimbabwe | 1.34 [1.06-1.66] | 2.39 [1.94-2.9] |  | 1.81 [1.44-2.22] | 1.84 [1.48-2.23] |  | 0.25 [-0.3 to 0.81] |
| Islamic Republic of Afghanistan | 1.12 [0.92-1.34] | 1.56 [1.28-1.87] |  | 1.79 [1.46-2.22] | 1.13 [0.92-1.37] |  | -2.94 [-4.21 to -1.66] |
| Islamic Republic of Mauritania | 4.15 [3.55-4.85] | 33.35 [28.45-38.95] |  | 1.69 [1.41-1.99] | 6.08 [5.07-7.18] |  | -5.3 [-5.55 to -5.04] |
| Republic of Honduras | 1.57 [1.28-1.9] | 5.92 [4.82-7.12] |  | 1.67 [1.32-2.05] | 2.14 [1.71-2.61] |  | -3.44 [-3.7 to -3.18] |
| Republic of Rwanda | 6.54 [5.54-7.76] | 16.66 [13.92-19.69] |  | 1.66 [1.31-2.11] | 1.85 [1.48-2.28] |  | -7.58 [-7.92 to -7.25] |
| Republic of Ecuador | 2.73 [2.33-3.19] | 4 [3.43-4.67] |  | 1.57 [1.29-1.84] | 0.9 [0.75-1.06] |  | -4.33 [-4.68 to -3.97] |
| Union of the Comoros | 1.36 [1.21-1.56] | 50.33 [44.28-57.03] |  | 1.54 [1.38-1.71] | 24.71 [22.24-27.34] |  | -2.37 [-2.71 to -2.03] |
| Republic of Peru | 3.46 [2.84-4.2] | 2.34 [1.94-2.8] |  | 1.39 [1.07-1.77] | 0.39 [0.3-0.5] |  | -5.79 [-6.1 to -5.47] |
| Kingdom of Morocco | 2.27 [1.83-2.77] | 1.31 [1.06-1.57] |  | 1.17 [0.9-1.5] | 0.32 [0.25-0.4] |  | -4.39 [-4.48 to -4.3] |
| Gabonese Republic | 2.81 [2.39-3.3] | 42.47 [36.04-50.29] |  | 1.05 [0.89-1.25] | 7.84 [6.59-9.19] |  | -5.24 [-5.4 to -5.08] |
| Republic of Guyana | 1.23 [1.05-1.43] | 24.13 [20.34-27.99] |  | 0.89 [0.77-1.04] | 12.59 [10.87-14.61] |  | -1.31 [-1.74 to -0.88] |
| Republic of Guinea-Bissau | 1.84 [1.56-2.14] | 34 [28.61-39.83] |  | 0.84 [0.71-0.99] | 7.24 [6.17-8.58] |  | -4.96 [-5.3 to -4.61] |
| Republic of Costa Rica | 0.73 [0.6-0.88] | 3.4 [2.81-4.08] |  | 0.82 [0.67-0.99] | 1.51 [1.23-1.84] |  | -2.54 [-2.68 to -2.41] |
| State of Eritrea | 1.65 [1.38-1.96] | 9 [7.58-10.59] |  | 0.82 [0.65-1.04] | 1.92 [1.54-2.35] |  | -4.58 [-4.74 to -4.41] |
| Republic of Kiribati | 0.73 [0.64-0.84] | 147.25 [127.61-168.35] |  | 0.78 [0.7-0.87] | 79.73 [71.32-88.76] |  | -1.48 [-1.64 to -1.31] |
| Republic of the Gambia | 0.88 [0.76-1.03] | 16.92 [14.48-19.74] |  | 0.78 [0.66-0.91] | 5.47 [4.61-6.4] |  | -3.85 [-4.1 to -3.6] |
| Republic of Trinidad and Tobago | 0.91 [0.77-1.07] | 9.34 [7.98-10.97] |  | 0.77 [0.65-0.9] | 4.29 [3.69-5.07] |  | -2.65 [-2.9 to -2.4] |
| Republic of Iraq | 1.38 [1.07-1.73] | 1.31 [1.04-1.61] |  | 0.71 [0.5-0.97] | 0.22 [0.16-0.3] |  | -5.89 [-6.14 to -5.63] |
| Republic of Mauritius | 0.73 [0.6-0.86] | 8.04 [6.7-9.55] |  | 0.7 [0.58-0.85] | 4.14 [3.44-5.05] |  | -1.79 [-1.93 to -1.65] |
| Federated States of Micronesia | 0.9 [0.79-1.03] | 135.88 [119.12-154.78] |  | 0.68 [0.62-0.75] | 73.25 [66.93-80.41] |  | -2.42 [-2.74 to -2.1] |
| Solomon Islands | 0.69 [0.59-0.8] | 35.89 [30.55-42.12] |  | 0.68 [0.58-0.79] | 14.07 [12.06-16.29] |  | -2.65 [-2.83 to -2.46] |
| Republic of Vanuatu | 0.46 [0.39-0.55] | 53.31 [44.83-63.11] |  | 0.63 [0.52-0.74] | 28.09 [23.55-33.33] |  | -1.96 [-2.05 to -1.86] |
| Republic of Fiji | 0.77 [0.65-0.93] | 14.68 [12.41-17.41] |  | 0.62 [0.51-0.73] | 7.06 [5.9-8.32] |  | -2.24 [-2.3 to -2.17] |
| Republic of Chile | 0.73 [0.55-0.93] | 0.64 [0.49-0.81] |  | 0.53 [0.37-0.71] | 0.22 [0.16-0.31] |  | -3.37 [-3.6 to -3.15] |
| Republic of Suriname | 0.55 [0.47-0.63] | 18.06 [15.54-20.97] |  | 0.51 [0.44-0.59] | 8.01 [6.89-9.24] |  | -2.57 [-2.62 to -2.52] |
| Republic of Namibia | 0.69 [0.58-0.83] | 8.19 [6.82-9.76] |  | 0.51 [0.43-0.61] | 2.83 [2.35-3.35] |  | -3.35 [-3.74 to -2.96] |
| Jamaica | 0.61 [0.51-0.74] | 3.31 [2.73-3.98] |  | 0.5 [0.4-0.6] | 1.6 [1.29-1.94] |  | -2.23 [-2.46 to -2] |
| Republic of El Salvador | 1.28 [1.04-1.54] | 3.63 [2.96-4.35] |  | 0.5 [0.39-0.63] | 0.8 [0.62-1.01] |  | -4.7 [-5.22 to -4.17] |
| Republic of Equatorial Guinea | 1.7 [1.47-1.99] | 68.26 [58.61-79.39] |  | 0.47 [0.39-0.56] | 5.25 [4.4-6.13] |  | -8.62 [-9.12 to -8.11] |
| Republic of Nicaragua | 0.57 [0.46-0.69] | 2.69 [2.19-3.21] |  | 0.41 [0.32-0.52] | 0.72 [0.56-0.89] |  | -4.14 [-4.25 to -4.02] |
| Independent State of Samoa | 0.56 [0.48-0.66] | 53.08 [45.11-61.89] |  | 0.4 [0.34-0.48] | 24.47 [20.65-28.69] |  | -2.14 [-2.24 to -2.04] |
| Kingdom of Bhutan | 1.19 [1.02-1.4] | 32.52 [27.85-37.91] |  | 0.37 [0.32-0.44] | 5.26 [4.48-6.23] |  | -5.93 [-6.04 to -5.82] |
| Republic of Panama | 0.41 [0.33-0.51] | 2.32 [1.87-2.84] |  | 0.34 [0.27-0.44] | 0.78 [0.61-1] |  | -3.16 [-3.41 to -2.91] |
| Kingdom of Saudi Arabia | 0.94 [0.7-1.26] | 1.03 [0.79-1.31] |  | 0.33 [0.21-0.47] | 0.1 [0.06-0.13] |  | -7.53 [-7.69 to -7.37] |
| Kingdom of Lesotho | 0.35 [0.28-0.42] | 3.45 [2.84-4.1] |  | 0.3 [0.24-0.37] | 2.18 [1.76-2.61] |  | -1.09 [-1.64 to -0.53] |
| State of Kuwait | 0.24 [0.2-0.3] | 2.09 [1.71-2.5] |  | 0.29 [0.24-0.36] | 0.61 [0.51-0.74] |  | -3.83 [-4.02 to -3.64] |
| Guam | 0.26 [0.23-0.31] | 24.36 [21.01-28.05] |  | 0.28 [0.24-0.32] | 14.77 [12.7-16.99] |  | -1.54 [-1.76 to -1.32] |
| State of Qatar | 0.08 [0.07-0.1] | 2.34 [1.99-2.77] |  | 0.26 [0.22-0.31] | 0.83 [0.71-0.96] |  | -3.82 [-4.01 to -3.63] |
| Republic of Botswana | 0.29 [0.24-0.35] | 3.87 [3.19-4.59] |  | 0.26 [0.2-0.31] | 1.29 [1.04-1.57] |  | -3.71 [-4.2 to -3.22] |
| State of Libya | 0.32 [0.26-0.39] | 1.27 [1.03-1.53] |  | 0.23 [0.18-0.29] | 0.33 [0.26-0.42] |  | -4.43 [-4.61 to -4.24] |
| Republic of Djibouti | 0.2 [0.17-0.25] | 8.79 [7.39-10.45] |  | 0.22 [0.18-0.28] | 2.36 [1.91-2.88] |  | -4.15 [-4.64 to -3.65] |
| Republic of the Marshall Islands | 0.14 [0.11-0.16] | 48.3 [40.83-57.08] |  | 0.21 [0.19-0.23] | 40.81 [36.65-45.36] |  | -1.07 [-1.82 to -0.32] |
| Japan | 0.16 [0.07-0.32] | 0.01 [0-0.02] |  | 0.2 [0.08-0.42] | 0.01 [0-0.02] |  | -0.4 [-0.44 to -0.36] |
| Saint Lucia | 0.2 [0.17-0.23] | 19.98 [16.93-23.73] |  | 0.19 [0.16-0.23] | 8.51 [7.25-9.9] |  | -2.52 [-2.8 to -2.24] |
| Republic of Cabo Verde | 0.27 [0.22-0.32] | 11.36 [9.4-13.59] |  | 0.18 [0.15-0.22] | 3.48 [2.81-4.27] |  | -4.15 [-4.34 to -3.97] |
| Republic of Maldives | 0.18 [0.16-0.21] | 14 [12.22-16.09] |  | 0.18 [0.15-0.22] | 3.45 [2.93-4.03] |  | -4.53 [-4.9 to -4.15] |
| Belize | 0.1 [0.09-0.12] | 9.1 [7.57-10.78] |  | 0.16 [0.13-0.19] | 4.4 [3.64-5.22] |  | -2.41 [-2.51 to -2.3] |
| Commonwealth of the Bahamas | 0.14 [0.12-0.17] | 7.27 [6.04-8.68] |  | 0.15 [0.13-0.19] | 3.59 [2.93-4.3] |  | -2.26 [-2.53 to -2] |
| Democratic Republic of Sao Tome and Principe | 0.21 [0.18-0.25] | 28.37 [23.85-33.67] |  | 0.13 [0.11-0.16] | 8.61 [7.2-10.09] |  | -3.96 [-4.15 to -3.76] |
| Kingdom of Tonga | 0.2 [0.16-0.23] | 29.89 [24.96-35.74] |  | 0.13 [0.11-0.15] | 15.04 [12.54-17.83] |  | -2.07 [-2.12 to -2.01] |
| Eastern Republic of Uruguay | 0.16 [0.12-0.19] | 0.44 [0.35-0.54] |  | 0.11 [0.09-0.14] | 0.25 [0.19-0.31] |  | -1.61 [-1.72 to -1.5] |
| Kingdom of Eswatini | 0.26 [0.21-0.31] | 6.12 [5.04-7.39] |  | 0.11 [0.09-0.14] | 1.39 [1.1-1.71] |  | -4.01 [-4.72 to -3.29] |
| Sultanate of Oman | 0.21 [0.17-0.26] | 1.78 [1.45-2.12] |  | 0.11 [0.08-0.14] | 0.26 [0.2-0.33] |  | -5.76 [-6.01 to -5.51] |
| Syrian Arab Republic | 0.57 [0.44-0.75] | 0.83 [0.65-1.04] |  | 0.11 [0.07-0.14] | 0.07 [0.05-0.1] |  | -7.32 [-7.5 to -7.15] |
| Barbados | 0.12 [0.1-0.15] | 4.63 [3.89-5.48] |  | 0.1 [0.08-0.11] | 2.22 [1.85-2.66] |  | -2.16 [-2.37 to -1.95] |
| Lebanese Republic | 0.43 [0.34-0.52] | 1.77 [1.42-2.14] |  | 0.1 [0.07-0.13] | 0.16 [0.12-0.21] |  | -7.47 [-7.64 to -7.29] |
| Republic of Singapore | 0.07 [0.06-0.09] | 0.25 [0.2-0.32] |  | 0.09 [0.07-0.12] | 0.12 [0.09-0.15] |  | -2.67 [-2.87 to -2.47] |
| American Samoa | 0.07 [0.07-0.09] | 23.06 [20.03-26.68] |  | 0.07 [0.06-0.08] | 13.06 [11.29-15.18] |  | -1.67 [-1.74 to -1.6] |
| Kingdom of Bahrain | 0.07 [0.05-0.08] | 1.91 [1.57-2.29] |  | 0.07 [0.05-0.08] | 0.43 [0.34-0.53] |  | -4.81 [-4.85 to -4.76] |
| Tuvalu | 0.11 [0.1-0.13] | 152.09 [131.27-175.83] |  | 0.05 [0.05-0.06] | 46.9 [41-54.02] |  | -3.35 [-3.51 to -3.2] |
| Northern Mariana Islands | 0.06 [0.05-0.07] | 17.44 [15-20.41] |  | 0.05 [0.04-0.06] | 9.39 [8.09-11.02] |  | -1.65 [-1.8 to -1.51] |
| Republic of Palau | 0.05 [0.05-0.06] | 42.75 [36.67-49.79] |  | 0.05 [0.04-0.06] | 22.41 [19.28-26.05] |  | -1.97 [-2.05 to -1.9] |
| Saint Vincent and the Grenadines | 0.06 [0.05-0.07] | 7.04 [6.02-8.24] |  | 0.05 [0.04-0.06] | 3.5 [2.97-4.1] |  | -2.14 [-2.31 to -1.96] |
| Republic of Tunisia | 0.64 [0.5-0.8] | 1.07 [0.84-1.32] |  | 0.05 [0.02-0.09] | 0.04 [0.02-0.07] |  | -9.97 [-10.22 to -9.71] |
| Republic of Seychelles | 0.05 [0.04-0.06] | 7.8 [6.68-9.07] |  | 0.04 [0.04-0.05] | 3.7 [3.11-4.32] |  | -2.26 [-2.36 to -2.15] |
| Commonwealth of Dominica | 0.05 [0.05-0.07] | 9.09 [7.66-10.76] |  | 0.04 [0.03-0.05] | 4.99 [4.19-5.93] |  | -1.7 [-1.94 to -1.45] |
| Grenada | 0.05 [0.04-0.06] | 7.58 [6.43-8.85] |  | 0.04 [0.03-0.04] | 3.16 [2.65-3.72] |  | -2.44 [-2.74 to -2.13] |
| Saint Kitts and Nevis | 0.05 [0.04-0.06] | 13.33 [11.36-15.5] |  | 0.03 [0.03-0.04] | 4.33 [3.67-5.09] |  | -3.37 [-3.77 to -2.97] |
| New Zealand | 0.02 [0.02-0.03] | 0.06 [0.04-0.08] |  | 0.03 [0.02-0.04] | 0.04 [0.03-0.06] |  | -1.16 [-1.32 to -1] |
| Cook Islands | 0.04 [0.03-0.04] | 24.75 [21.18-29.22] |  | 0.02 [0.02-0.03] | 10.04 [8.52-11.88] |  | -2.78 [-2.87 to -2.7] |
| Republic of Nauru | 0.03 [0.02-0.03] | 42.26 [36.64-48.96] |  | 0.02 [0.01-0.02] | 19.21 [16.65-22.24] |  | -2.42 [-2.91 to -1.92] |
| Brunei Darussalam | 0.01 [0.01-0.01] | 0.55 [0.45-0.67] |  | 0.01 [0.01-0.02] | 0.28 [0.23-0.35] |  | -2.12 [-2.33 to -1.92] |
| Antigua and Barbuda | 0 [0-0] | 0 [0-0] |  | 0 [0-0] | 0 [0-0] |  | NA |
| Australia | 0 [0-0] | 0 [0-0] |  | 0 [0-0] | 0 [0-0] |  | NA |
| Bermuda | 0 [0-0] | 0 [0-0] |  | 0 [0-0] | 0 [0-0] |  | NA |
| Bosnia and Herzegovina | 0 [0-0] | 0 [0-0] |  | 0 [0-0] | 0 [0-0] |  | NA |
| Canada | 0 [0-0] | 0 [0-0] |  | 0 [0-0] | 0 [0-0] |  | NA |
| Czech Republic | 0 [0-0] | 0 [0-0] |  | 0 [0-0] | 0 [0-0] |  | NA |
| Democratic People's Republic of Korea | 0 [0-0] | 0 [0-0] |  | 0 [0-0] | 0 [0-0] |  | NA |
| Federal Republic of Germany | 0 [0-0] | 0 [0-0] |  | 0 [0-0] | 0 [0-0] |  | NA |
| French Republic | 0 [0-0] | 0 [0-0] |  | 0 [0-0] | 0 [0-0] |  | NA |
| Georgia | 0 [0-0] | 0 [0-0] |  | 0 [0-0] | 0 [0-0] |  | NA |
| Grand Duchy of Luxembourg | 0 [0-0] | 0 [0-0] |  | 0 [0-0] | 0 [0-0] |  | NA |
| Greenland | 0 [0-0] | 0 [0-0] |  | 0 [0-0] | 0 [0-0] |  | NA |
| Hashemite Kingdom of Jordan | 0 [0-0] | 0 [0-0] |  | 0 [0-0] | 0 [0-0] |  | NA |
| Hellenic Republic | 0 [0-0] | 0 [0-0] |  | 0 [0-0] | 0 [0-0] |  | NA |
| Hungary | 0 [0-0] | 0 [0-0] |  | 0 [0-0] | 0 [0-0] |  | NA |
| Ireland | 0 [0-0] | 0 [0-0] |  | 0 [0-0] | 0 [0-0] |  | NA |
| Kingdom of Belgium | 0 [0-0] | 0 [0-0] |  | 0 [0-0] | 0 [0-0] |  | NA |
| Kingdom of Denmark | 0 [0-0] | 0 [0-0] |  | 0 [0-0] | 0 [0-0] |  | NA |
| Kingdom of Norway | 0 [0-0] | 0 [0-0] |  | 0 [0-0] | 0 [0-0] |  | NA |
| Kingdom of Spain | 0 [0-0] | 0 [0-0] |  | 0 [0-0] | 0 [0-0] |  | NA |
| Kingdom of Sweden | 0 [0-0] | 0 [0-0] |  | 0 [0-0] | 0 [0-0] |  | NA |
| Kingdom of the Netherlands | 0 [0-0] | 0 [0-0] |  | 0 [0-0] | 0 [0-0] |  | NA |
| Kyrgyz Republic | 0 [0-0] | 0 [0-0] |  | 0 [0-0] | 0 [0-0] |  | NA |
| Mongolia | 0 [0-0] | 0 [0-0] |  | 0 [0-0] | 0 [0-0] |  | NA |
| Montenegro | 0 [0-0] | 0 [0-0] |  | 0 [0-0] | 0 [0-0] |  | NA |
| North Macedonia | 0 [0-0] | 0 [0-0] |  | 0 [0-0] | 0 [0-0] |  | NA |
| Palestine | 0 [0-0] | 0 [0-0] |  | 0 [0-0] | 0 [0-0] |  | NA |
| People's Democratic Republic of Algeria | 0 [0-0] | 0 [0-0] |  | 0 [0-0] | 0 [0-0] |  | NA |
| Portuguese Republic | 0 [0-0] | 0 [0-0] |  | 0 [0-0] | 0 [0-0] |  | NA |
| Principality of Andorra | 0 [0-0] | 0 [0-0] |  | 0 [0-0] | 0 [0-0] |  | NA |
| Principality of Monaco | 0 [0-0] | 0 [0-0] |  | 0 [0-0] | 0 [0-0] |  | NA |
| Puerto Rico | 0 [0-0] | 0 [0-0] |  | 0 [0-0] | 0 [0-0] |  | NA |
| Republic of Albania | 0 [0-0] | 0 [0-0] |  | 0 [0-0] | 0 [0-0] |  | NA |
| Republic of Armenia | 0 [0-0] | 0 [0-0] |  | 0 [0-0] | 0 [0-0] |  | NA |
| Republic of Austria | 0 [0-0] | 0 [0-0] |  | 0 [0-0] | 0 [0-0] |  | NA |
| Republic of Azerbaijan | 0 [0-0] | 0 [0-0] |  | 0 [0-0] | 0 [0-0] |  | NA |
| Republic of Belarus | 0 [0-0] | 0 [0-0] |  | 0 [0-0] | 0 [0-0] |  | NA |
| Republic of Bulgaria | 0 [0-0] | 0 [0-0] |  | 0 [0-0] | 0 [0-0] |  | NA |
| Republic of Croatia | 0 [0-0] | 0 [0-0] |  | 0 [0-0] | 0 [0-0] |  | NA |
| Republic of Cyprus | 0 [0-0] | 0 [0-0] |  | 0 [0-0] | 0 [0-0] |  | NA |
| Republic of Estonia | 0 [0-0] | 0 [0-0] |  | 0 [0-0] | 0 [0-0] |  | NA |
| Republic of Finland | 0 [0-0] | 0 [0-0] |  | 0 [0-0] | 0 [0-0] |  | NA |
| Republic of Iceland | 0 [0-0] | 0 [0-0] |  | 0 [0-0] | 0 [0-0] |  | NA |
| Republic of Italy | 0 [0-0] | 0 [0-0] |  | 0 [0-0] | 0 [0-0] |  | NA |
| Republic of Latvia | 0 [0-0] | 0 [0-0] |  | 0 [0-0] | 0 [0-0] |  | NA |
| Republic of Lithuania | 0 [0-0] | 0 [0-0] |  | 0 [0-0] | 0 [0-0] |  | NA |
| Republic of Malta | 0 [0-0] | 0 [0-0] |  | 0 [0-0] | 0 [0-0] |  | NA |
| Republic of Moldova | 0 [0-0] | 0 [0-0] |  | 0 [0-0] | 0 [0-0] |  | NA |
| Republic of Niue | 0.01 [0.01-0.01] | 32.85 [28.08-38.34] |  | 0 [0-0] | 15.16 [12.87-17.79] |  | -2.44 [-2.46 to -2.43] |
| Republic of Poland | 0 [0-0] | 0 [0-0] |  | 0 [0-0] | 0 [0-0] |  | NA |
| Republic of San Marino | 0 [0-0] | 0 [0-0] |  | 0 [0-0] | 0 [0-0] |  | NA |
| Republic of Serbia | 0 [0-0] | 0 [0-0] |  | 0 [0-0] | 0 [0-0] |  | NA |
| Republic of Slovenia | 0 [0-0] | 0 [0-0] |  | 0 [0-0] | 0 [0-0] |  | NA |
| Republic of Tajikistan | 0 [0-0] | 0 [0-0] |  | 0 [0-0] | 0 [0-0] |  | NA |
| Republic of Turkey | 0 [0-0] | 0 [0-0] |  | 0 [0-0] | 0 [0-0] |  | NA |
| Republic of Uzbekistan | 0 [0-0] | 0 [0-0] |  | 0 [0-0] | 0 [0-0] |  | NA |
| Romania | 0 [0-0] | 0 [0-0] |  | 0 [0-0] | 0 [0-0] |  | NA |
| Russian Federation | 0 [0-0] | 0 [0-0] |  | 0 [0-0] | 0 [0-0] |  | NA |
| Slovak Republic | 0 [0-0] | 0 [0-0] |  | 0 [0-0] | 0 [0-0] |  | NA |
| State of Israel | 0 [0-0] | 0 [0-0] |  | 0 [0-0] | 0 [0-0] |  | NA |
| Swiss Confederation | 0 [0-0] | 0 [0-0] |  | 0 [0-0] | 0 [0-0] |  | NA |
| Taiwan (Province of China) | 0 [0-0] | 0 [0-0] |  | 0 [0-0] | 0 [0-0] |  | NA |
| Tokelau | 0 [0-0.01] | 34.35 [29.67-40.03] |  | 0 [0-0] | 12.41 [10.75-14.4] |  | -3.18 [-3.22 to -3.13] |
| Turkmenistan | 0 [0-0] | 0 [0-0] |  | 0 [0-0] | 0 [0-0] |  | NA |
| Ukraine | 0 [0-0] | 0 [0-0] |  | 0 [0-0] | 0 [0-0] |  | NA |
| United Kingdom of Great Britain and Northern Ireland | 0 [0-0] | 0 [0-0] |  | 0 [0-0] | 0 [0-0] |  | NA |
| United States of America | 0 [0-0] | 0 [0-0] |  | 0 [0-0] | 0 [0-0] |  | NA |
| United States Virgin Islands | 0 [0-0] | 0 [0-0] |  | 0 [0-0] | 0 [0-0] |  | NA |

## Table S2 Incidence of leprosy in 1990 and 2021 by 204 Countries and territories

B

|  | 1990 | |  | 2021 | |  | 1990-2021 |
| --- | --- | --- | --- | --- | --- | --- | --- |
| **Countries and territories** | **Incident cases No. *102 (95% UI)** | **ASIR per 100,000 No. (95% UI)** |  | **Prevalent cases No. *102 (95% UI)** | **ASIR per 100,000 No. (95% UI)** |  | **EAPC of ASIR No. (95% CI)** |
| Federative Republic of Brazil | 70.51 [58.29-84.61] | 5.78 [4.79-7.04] |  | 88.84 [73.42-108.1] | 3.61 [3.01-4.38] |  | -1.3 [-1.41 to -1.18] |
| People's Republic of Bangladesh | 38.31 [35.11-41.71] | 5.18 [4.77-5.59] |  | 8.56 [7.9-9.22] | 0.53 [0.49-0.57] |  | -6.93 [-7.09 to -6.76] |
| Democratic Republic of the Congo | 16.09 [14.55-17.55] | 6.32 [5.72-6.92] |  | 7.96 [7.38-8.55] | 1.23 [1.15-1.31] |  | -4.92 [-5.48 to -4.36] |
| Republic of the Philippines | 3.64 [2.97-4.39] | 0.76 [0.63-0.94] |  | 6 [4.92-7.21] | 0.57 [0.47-0.69] |  | -0.69 [-0.81 to -0.57] |
| Federal Democratic Republic of Nepal | 29.26 [27.13-31.71] | 21.03 [19.64-22.56] |  | 5.95 [5.58-6.37] | 2.1 [1.97-2.24] |  | -6.78 [-7.14 to -6.43] |
| People's Republic of China | 12.11 [10.18-14.38] | 0.11 [0.09-0.13] |  | 5.2 [4.17-6.36] | 0.03 [0.02-0.04] |  | -4.3 [-4.5 to -4.1] |
| Republic of Indonesia | 30.19 [25.51-35.66] | 2 [1.69-2.38] |  | 45.17 [37.53-54.58] | 1.55 [1.3-1.87] |  | -0.55 [-0.62 to -0.49] |
| Republic of the Union of Myanmar | 15.41 [13.71-17.42] | 4.66 [4.17-5.24] |  | 4.8 [4.45-5.13] | 0.86 [0.8-0.91] |  | -5.82 [-6.17 to -5.47] |
| United Republic of Tanzania | 5 [4.36-5.8] | 2.94 [2.56-3.42] |  | 4.53 [4.19-4.88] | 1.08 [1-1.15] |  | -3.19 [-3.48 to -2.9] |
| Islamic Republic of Pakistan | 3.05 [2.62-3.57] | 0.35 [0.3-0.41] |  | 4.16 [3.56-4.84] | 0.21 [0.18-0.24] |  | -1.84 [-1.96 to -1.72] |
| Democratic Socialist Republic of Sri Lanka | 6.11 [5.65-6.65] | 4.05 [3.76-4.39] |  | 4.03 [3.77-4.32] | 1.62 [1.51-1.74] |  | -3.14 [-3.28 to -3] |
| Republic of Madagascar | 6 [5.36-6.76] | 7.64 [6.82-8.59] |  | 3.99 [3.73-4.25] | 1.94 [1.82-2.05] |  | -3.78 [-3.96 to -3.6] |
| Republic of Mozambique | 8.84 [7.48-10.24] | 9.82 [8.29-11.41] |  | 3.75 [3.49-4.03] | 1.82 [1.71-1.94] |  | -4.36 [-4.66 to -4.06] |
| Republic of India | 475.49 [396.37-564.37] | 6.83 [5.68-8.23] |  | 220.31 [185.07-259.25] | 1.55 [1.31-1.83] |  | -4.24 [-4.36 to -4.11] |
| Federal Republic of Nigeria | 10.15 [8.71-11.84] | 1.57 [1.33-1.86] |  | 12.81 [10.94-15.13] | 0.79 [0.67-0.94] |  | -2.09 [-2.14 to -2.04] |
| Federal Democratic Republic of Ethiopia | 12.45 [10.86-14.41] | 3.78 [3.26-4.39] |  | 11.14 [9.44-13.24] | 1.46 [1.22-1.75] |  | -3.07 [-3.26 to -2.87] |
| Republic of C么te d'Ivoire | 2.25 [2.04-2.48] | 2.87 [2.6-3.17] |  | 1.83 [1.69-1.98] | 0.91 [0.84-0.97] |  | -3.52 [-3.87 to -3.17] |
| Republic of Sudan | 2.49 [2.24-2.72] | 1.8 [1.64-1.97] |  | 1.76 [1.61-1.94] | 0.53 [0.49-0.58] |  | -4 [-4.45 to -3.55] |
| Republic of Angola | 5.96 [5.41-6.51] | 8.7 [7.93-9.51] |  | 1.68 [1.54-1.83] | 0.76 [0.7-0.82] |  | -7.54 [-7.85 to -7.23] |
| Republic of South Sudan | 1.77 [1.55-2.02] | 4.41 [3.83-5.1] |  | 1.67 [1.52-1.84] | 2.5 [2.3-2.72] |  | -1.1 [-1.52 to -0.69] |
| Socialist Republic of Viet Nam | 3.59 [3.16-4.03] | 0.65 [0.57-0.73] |  | 1.67 [1.46-1.9] | 0.16 [0.14-0.18] |  | -4.47 [-4.61 to -4.34] |
| Federal Republic of Somalia | 0.78 [0.68-0.88] | 1.51 [1.33-1.69] |  | 1.59 [1.44-1.75] | 1.18 [1.07-1.28] |  | -0.32 [-0.7 to 0.06] |
| Arab Republic of Egypt | 3.4 [3.05-3.81] | 0.83 [0.75-0.92] |  | 1.43 [1.29-1.59] | 0.16 [0.14-0.17] |  | -4.38 [-4.7 to -4.06] |
| Republic of Kazakhstan | 1.39 [1.11-1.76] | 0.93 [0.75-1.18] |  | 1.36 [1.07-1.69] | 0.7 [0.56-0.88] |  | -1.34 [-1.66 to -1.03] |
| Bolivarian Republic of Venezuela | 1.57 [1.42-1.72] | 1.09 [1-1.19] |  | 1.33 [1.23-1.44] | 0.45 [0.42-0.49] |  | -2.86 [-3.12 to -2.6] |
| Republic of the Niger | 1.84 [1.67-2.03] | 3.74 [3.41-4.12] |  | 1.27 [1.17-1.4] | 0.84 [0.78-0.9] |  | -5.2 [-5.54 to -4.87] |
| Kingdom of Thailand | 2.89 [2.53-3.3] | 0.55 [0.49-0.62] |  | 1.27 [1.09-1.45] | 0.15 [0.13-0.17] |  | -4.07 [-4.25 to -3.89] |
| Burkina Faso | 2.15 [1.97-2.34] | 3.48 [3.2-3.8] |  | 1.12 [1.02-1.24] | 0.71 [0.65-0.78] |  | -4.6 [-4.9 to -4.31] |
| Independent State of Papua New Guinea | 0.64 [0.58-0.71] | 2.07 [1.87-2.28] |  | 1.04 [0.96-1.13] | 1.22 [1.13-1.31] |  | -1.41 [-1.53 to -1.28] |
| Republic of Paraguay | 1.18 [1.07-1.28] | 3.86 [3.55-4.2] |  | 1.04 [0.96-1.11] | 1.51 [1.4-1.61] |  | -2.71 [-2.8 to -2.63] |
| Republic of Ghana | 1.74 [1.57-1.91] | 1.71 [1.57-1.87] |  | 1.03 [0.93-1.12] | 0.38 [0.35-0.41] |  | -4.08 [-4.24 to -3.92] |
| Republic of Colombia | 1.76 [1.57-1.97] | 0.69 [0.62-0.77] |  | 0.99 [0.89-1.09] | 0.18 [0.17-0.2] |  | -3.89 [-4.13 to -3.66] |
| Republic of Chad | 0.74 [0.67-0.82] | 1.85 [1.66-2.06] |  | 0.96 [0.88-1.04] | 0.9 [0.83-0.96] |  | -2.9 [-3.46 to -2.35] |
| Republic of Cameroon | 0.84 [0.76-0.93] | 1.2 [1.09-1.32] |  | 0.89 [0.82-0.97] | 0.4 [0.36-0.43] |  | -3.76 [-4.2 to -3.33] |
| Republic of Guinea | 2.21 [2.05-2.4] | 5.22 [4.83-5.66] |  | 0.86 [0.79-0.94] | 0.93 [0.86-1.01] |  | -5.05 [-5.27 to -4.83] |
| Republic of Burundi | 0.91 [0.82-1.01] | 2.43 [2.18-2.7] |  | 0.85 [0.77-0.94] | 0.95 [0.87-1.03] |  | -3.43 [-3.74 to -3.12] |
| Republic of Yemen | 0.81 [0.73-0.9] | 0.98 [0.89-1.09] |  | 0.83 [0.76-0.91] | 0.34 [0.31-0.37] |  | -3.84 [-4.04 to -3.64] |
| Republic of Uganda | 1.26 [1.14-1.4] | 1.15 [1.04-1.28] |  | 0.83 [0.74-0.93] | 0.28 [0.25-0.31] |  | -4.47 [-4.79 to -4.14] |
| Republic of Kenya | 0.33 [0.29-0.39] | 0.22 [0.19-0.26] |  | 0.78 [0.65-0.91] | 0.2 [0.17-0.23] |  | -0.11 [-0.21 to -0.01] |
| United Mexican States | 0.53 [0.44-0.63] | 0.08 [0.07-0.1] |  | 0.77 [0.62-0.93] | 0.06 [0.05-0.07] |  | -1.02 [-1.14 to -0.89] |
| Argentine Republic | 1.08 [0.96-1.22] | 0.33 [0.3-0.38] |  | 0.74 [0.67-0.81] | 0.15 [0.13-0.16] |  | -2.26 [-2.46 to -2.07] |
| Republic of Malawi | 1.16 [1.01-1.36] | 1.78 [1.52-2.09] |  | 0.7 [0.63-0.77] | 0.51 [0.47-0.56] |  | -4.06 [-4.32 to -3.79] |
| Republic of Liberia | 0.77 [0.67-0.87] | 4.56 [3.94-5.27] |  | 0.7 [0.63-0.77] | 1.77 [1.61-1.94] |  | -4.56 [-5.06 to -4.05] |
| Republic of Benin | 0.95 [0.86-1.06] | 3.09 [2.8-3.42] |  | 0.67 [0.61-0.74] | 0.72 [0.66-0.79] |  | -4.47 [-4.71 to -4.22] |
| Republic of Sierra Leone | 1.49 [1.36-1.62] | 5.12 [4.7-5.57] |  | 0.65 [0.6-0.72] | 1.02 [0.93-1.11] |  | -4.58 [-4.86 to -4.3] |
| Republic of Senegal | 1.1 [0.99-1.21] | 2.21 [2-2.43] |  | 0.65 [0.59-0.71] | 0.54 [0.5-0.59] |  | -3.96 [-4.1 to -3.81] |
| Kingdom of Cambodia | 1.72 [1.56-1.9] | 2.34 [2.14-2.56] |  | 0.62 [0.57-0.68] | 0.39 [0.35-0.42] |  | -6.17 [-6.43 to -5.9] |
| Malaysia | 0.78 [0.68-0.9] | 0.54 [0.47-0.62] |  | 0.59 [0.53-0.65] | 0.18 [0.16-0.2] |  | -3.54 [-3.73 to -3.34] |
| Republic of Cuba | 0.77 [0.69-0.85] | 0.71 [0.64-0.78] |  | 0.58 [0.53-0.63] | 0.39 [0.36-0.42] |  | -1.88 [-2.04 to -1.72] |
| Republic of Mali | 1.27 [1.12-1.42] | 2.19 [1.94-2.45] |  | 0.57 [0.51-0.62] | 0.37 [0.34-0.4] |  | -5.38 [-5.67 to -5.08] |
| Republic of Zambia | 0.69 [0.61-0.77] | 1.37 [1.21-1.55] |  | 0.49 [0.44-0.54] | 0.36 [0.33-0.4] |  | -4.91 [-5.58 to -4.24] |
| Central African Republic | 0.87 [0.79-0.97] | 4.58 [4.09-5.1] |  | 0.46 [0.42-0.51] | 1.15 [1.05-1.27] |  | -4.41 [-4.79 to -4.03] |
| Union of the Comoros | 0.28 [0.26-0.32] | 9.19 [8.31-10.31] |  | 0.46 [0.42-0.51] | 7.09 [6.4-7.81] |  | -1.58 [-2.18 to -0.98] |
| United Arab Emirates | 0.13 [0.11-0.16] | 0.84 [0.71-1] |  | 0.46 [0.36-0.58] | 0.37 [0.31-0.46] |  | -2.31 [-2.57 to -2.04] |
| Dominican Republic | 0.6 [0.55-0.67] | 1.11 [1.01-1.24] |  | 0.44 [0.4-0.47] | 0.4 [0.37-0.43] |  | -2.76 [-3.22 to -2.3] |
| Republic of the Congo | 0.8 [0.72-0.88] | 4.74 [4.26-5.26] |  | 0.34 [0.31-0.38] | 0.78 [0.71-0.85] |  | -5.92 [-6.2 to -5.63] |
| Togolese Republic | 0.39 [0.35-0.43] | 1.67 [1.48-1.85] |  | 0.32 [0.29-0.35] | 0.48 [0.44-0.53] |  | -3.82 [-4.13 to -3.51] |
| Islamic Republic of Iran | 0.12 [0.1-0.14] | 0.03 [0.02-0.03] |  | 0.31 [0.25-0.37] | 0.03 [0.03-0.04] |  | 1.18 [0.66 to 1.7] |
| Democratic Republic of Timor-Leste | 0.42 [0.36-0.49] | 7.37 [6.49-8.54] |  | 0.26 [0.24-0.28] | 2.3 [2.11-2.48] |  | -4.75 [-5.19 to -4.32] |
| Republic of South Africa | 0.19 [0.16-0.23] | 0.06 [0.05-0.07] |  | 0.24 [0.19-0.28] | 0.04 [0.03-0.05] |  | -1.46 [-1.59 to -1.34] |
| Plurinational State of Bolivia | 0.49 [0.44-0.55] | 1.05 [0.93-1.17] |  | 0.23 [0.21-0.25] | 0.21 [0.19-0.23] |  | -5.67 [-5.97 to -5.37] |
| Federated States of Micronesia | 0.22 [0.19-0.26] | 29.81 [25.4-35.37] |  | 0.22 [0.2-0.24] | 22.57 [20.58-24.81] |  | -1.97 [-2.56 to -1.37] |
| Lao People's Democratic Republic | 0.81 [0.73-0.9] | 2.61 [2.35-2.9] |  | 0.21 [0.19-0.24] | 0.32 [0.29-0.35] |  | -6.92 [-7.11 to -6.73] |
| Republic of Ecuador | 0.42 [0.37-0.49] | 0.56 [0.49-0.65] |  | 0.21 [0.18-0.23] | 0.12 [0.1-0.13] |  | -4.39 [-4.79 to -3.98] |
| Republic of Kiribati | 0.13 [0.11-0.14] | 21.58 [18.81-24.87] |  | 0.19 [0.18-0.21] | 18.21 [16.5-19.88] |  | -0.59 [-0.92 to -0.27] |
| Republic of Haiti | 0.42 [0.37-0.5] | 0.89 [0.76-1.04] |  | 0.18 [0.16-0.21] | 0.16 [0.14-0.19] |  | -5.1 [-5.51 to -4.68] |
| Republic of Guatemala | 0.26 [0.21-0.3] | 0.44 [0.36-0.52] |  | 0.14 [0.12-0.17] | 0.1 [0.08-0.12] |  | -4.4 [-4.89 to -3.9] |
| Islamic Republic of Mauritania | 0.43 [0.38-0.48] | 2.97 [2.62-3.35] |  | 0.13 [0.12-0.15] | 0.41 [0.36-0.47] |  | -5.78 [-5.94 to -5.62] |
| Republic of Rwanda | 0.54 [0.47-0.62] | 1.11 [0.95-1.29] |  | 0.12 [0.1-0.14] | 0.11 [0.1-0.13] |  | -8.01 [-8.41 to -7.62] |
| Islamic Republic of Afghanistan | 0.1 [0.08-0.11] | 0.13 [0.1-0.15] |  | 0.12 [0.1-0.14] | 0.06 [0.05-0.07] |  | -3.93 [-4.75 to -3.1] |
| Republic of Korea | 0.27 [0.22-0.32] | 0.06 [0.05-0.07] |  | 0.12 [0.09-0.15] | 0.02 [0.01-0.02] |  | -4.02 [-4.49 to -3.56] |
| Kingdom of Morocco | 0.2 [0.17-0.24] | 0.1 [0.09-0.12] |  | 0.1 [0.08-0.12] | 0.03 [0.02-0.03] |  | -4.29 [-4.34 to -4.24] |
| Republic of Zimbabwe | 0.07 [0.06-0.09] | 0.1 [0.08-0.12] |  | 0.1 [0.08-0.12] | 0.08 [0.06-0.09] |  | 0.39 [-0.19 to 0.97] |
| Republic of Peru | 0.28 [0.24-0.33] | 0.16 [0.14-0.19] |  | 0.09 [0.08-0.11] | 0.03 [0.02-0.03] |  | -5.89 [-6.23 to -5.55] |
| Republic of Guinea-Bissau | 0.19 [0.17-0.21] | 2.81 [2.48-3.21] |  | 0.09 [0.08-0.1] | 0.62 [0.55-0.71] |  | -5 [-5.29 to -4.7] |
| Republic of the Gambia | 0.11 [0.09-0.12] | 1.67 [1.45-1.9] |  | 0.09 [0.08-0.1] | 0.51 [0.45-0.57] |  | -3.86 [-4.01 to -3.72] |
| Republic of the Marshall Islands | 0.06 [0.04-0.07] | 17.79 [14.15-21.69] |  | 0.09 [0.08-0.1] | 17.47 [15.63-19.59] |  | -0.74 [-1.62 to 0.14] |
| Republic of Honduras | 0.09 [0.07-0.1] | 0.26 [0.21-0.31] |  | 0.08 [0.07-0.1] | 0.09 [0.07-0.11] |  | -3.53 [-3.79 to -3.25] |
| Republic of Guyana | 0.13 [0.12-0.15] | 2.24 [1.98-2.55] |  | 0.08 [0.07-0.09] | 1.04 [0.94-1.14] |  | -1.71 [-2.04 to -1.38] |
| State of Qatar | 0.02 [0.01-0.02] | 0.47 [0.38-0.58] |  | 0.08 [0.07-0.09] | 0.24 [0.21-0.27] |  | -3.19 [-3.54 to -2.83] |
| Solomon Islands | 0.07 [0.06-0.08] | 3.12 [2.7-3.58] |  | 0.07 [0.07-0.08] | 1.34 [1.2-1.48] |  | -2.2 [-2.48 to -1.91] |
| Gabonese Republic | 0.2 [0.17-0.23] | 2.61 [2.24-3.03] |  | 0.07 [0.07-0.08] | 0.48 [0.42-0.55] |  | -5.22 [-5.36 to -5.09] |
| Republic of Trinidad and Tobago | 0.1 [0.08-0.11] | 0.91 [0.79-1.04] |  | 0.07 [0.07-0.08] | 0.44 [0.39-0.48] |  | -2.62 [-2.78 to -2.45] |
| Republic of Suriname | 0.08 [0.07-0.09] | 2.5 [2.18-2.84] |  | 0.07 [0.06-0.07] | 1.08 [0.98-1.19] |  | -2.78 [-2.89 to -2.66] |
| State of Eritrea | 0.15 [0.13-0.17] | 0.63 [0.54-0.73] |  | 0.06 [0.05-0.07] | 0.12 [0.1-0.14] |  | -4.88 [-5.09 to -4.66] |
| Republic of Equatorial Guinea | 0.19 [0.16-0.22] | 6.56 [5.58-7.74] |  | 0.06 [0.05-0.06] | 0.51 [0.44-0.58] |  | -8.96 [-9.59 to -8.33] |
| Republic of Costa Rica | 0.05 [0.04-0.06] | 0.21 [0.18-0.25] |  | 0.06 [0.05-0.06] | 0.1 [0.09-0.12] |  | -2.06 [-2.21 to -1.92] |
| Republic of Namibia | 0.05 [0.04-0.06] | 0.51 [0.43-0.59] |  | 0.04 [0.04-0.05] | 0.2 [0.17-0.22] |  | -3.2 [-3.6 to -2.81] |
| State of Kuwait | 0.03 [0.02-0.03] | 0.19 [0.16-0.23] |  | 0.04 [0.04-0.05] | 0.08 [0.07-0.1] |  | -2.89 [-2.99 to -2.8] |
| Kingdom of Saudi Arabia | 0.09 [0.07-0.11] | 0.08 [0.07-0.1] |  | 0.04 [0.03-0.05] | 0.01 [0.01-0.01] |  | -6.42 [-6.5 to -6.33] |
| Republic of Iraq | 0.08 [0.06-0.09] | 0.06 [0.04-0.07] |  | 0.04 [0.03-0.05] | 0.01 [0.01-0.01] |  | -5.8 [-6.04 to -5.55] |
| Republic of Vanuatu | 0.03 [0.03-0.04] | 2.8 [2.41-3.26] |  | 0.04 [0.03-0.04] | 1.46 [1.26-1.7] |  | -1.96 [-2.05 to -1.88] |
| Jamaica | 0.04 [0.04-0.05] | 0.22 [0.18-0.25] |  | 0.03 [0.03-0.04] | 0.11 [0.09-0.13] |  | -2.1 [-2.35 to -1.84] |
| Guam | 0.03 [0.03-0.04] | 2.6 [2.21-3.09] |  | 0.03 [0.03-0.04] | 1.79 [1.57-2.05] |  | -1.11 [-1.35 to -0.88] |
| Kingdom of Bhutan | 0.12 [0.1-0.14] | 2.55 [2.19-2.95] |  | 0.03 [0.03-0.04] | 0.45 [0.39-0.5] |  | -5.81 [-5.96 to -5.66] |
| Republic of Fiji | 0.05 [0.04-0.06] | 0.78 [0.66-0.9] |  | 0.03 [0.03-0.04] | 0.37 [0.32-0.42] |  | -2.22 [-2.3 to -2.14] |
| Republic of Nicaragua | 0.05 [0.04-0.06] | 0.18 [0.15-0.21] |  | 0.03 [0.03-0.04] | 0.05 [0.04-0.06] |  | -3.83 [-3.94 to -3.72] |
| Republic of Mauritius | 0.05 [0.04-0.05] | 0.44 [0.37-0.52] |  | 0.03 [0.03-0.04] | 0.21 [0.18-0.25] |  | -1.94 [-2.14 to -1.74] |
| Independent State of Samoa | 0.04 [0.04-0.05] | 3.52 [3.04-4.05] |  | 0.03 [0.03-0.03] | 1.64 [1.43-1.87] |  | -2.14 [-2.27 to -2.02] |
| Republic of El Salvador | 0.08 [0.07-0.09] | 0.19 [0.16-0.22] |  | 0.03 [0.02-0.03] | 0.04 [0.03-0.05] |  | -4.71 [-5.25 to -4.16] |
| Republic of Maldives | 0.03 [0.03-0.04] | 2.2 [1.86-2.64] |  | 0.03 [0.02-0.03] | 0.49 [0.42-0.57] |  | -4.95 [-5.38 to -4.52] |
| Republic of Chile | 0.04 [0.03-0.05] | 0.03 [0.03-0.04] |  | 0.02 [0.02-0.03] | 0.01 [0.01-0.01] |  | -3.63 [-3.88 to -3.37] |
| State of Libya | 0.03 [0.02-0.03] | 0.09 [0.08-0.11] |  | 0.02 [0.02-0.03] | 0.03 [0.03-0.04] |  | -3.7 [-3.98 to -3.42] |
| Republic of Singapore | 0.02 [0.01-0.02] | 0.06 [0.04-0.07] |  | 0.02 [0.02-0.03] | 0.03 [0.02-0.04] |  | -2.38 [-2.55 to -2.21] |
| Saint Lucia | 0.02 [0.02-0.02] | 1.8 [1.56-2.11] |  | 0.02 [0.02-0.02] | 0.85 [0.74-0.98] |  | -2.31 [-2.55 to -2.07] |
| Republic of Cabo Verde | 0.02 [0.02-0.03] | 0.94 [0.79-1.11] |  | 0.02 [0.02-0.02] | 0.34 [0.28-0.4] |  | -3.69 [-3.85 to -3.53] |
| Kingdom of Lesotho | 0.02 [0.02-0.02] | 0.17 [0.14-0.2] |  | 0.02 [0.02-0.02] | 0.11 [0.09-0.13] |  | -0.92 [-1.48 to -0.36] |
| Republic of Panama | 0.02 [0.02-0.03] | 0.11 [0.09-0.14] |  | 0.02 [0.01-0.02] | 0.04 [0.03-0.05] |  | -3.17 [-3.43 to -2.92] |
| Republic of Botswana | 0.02 [0.02-0.02] | 0.2 [0.17-0.24] |  | 0.02 [0.01-0.02] | 0.07 [0.06-0.09] |  | -3.57 [-4.07 to -3.07] |
| Saint Vincent and the Grenadines | 0.01 [0.01-0.01] | 0.79 [0.65-0.95] |  | 0.01 [0-0.01] | 0.43 [0.36-0.52] |  | -1.9 [-2.04 to -1.76] |
| Japan | 0.01 [0.01-0.02] | 0 [0-0] |  | 0.01 [0.01-0.02] | 0 [0-0] |  | -0.52 [-0.58 to -0.47] |
| Belize | 0.01 [0.01-0.01] | 0.65 [0.54-0.76] |  | 0.01 [0.01-0.02] | 0.33 [0.28-0.4] |  | -2.28 [-2.4 to -2.16] |
| Eastern Republic of Uruguay | 0.02 [0.02-0.03] | 0.07 [0.05-0.08] |  | 0.01 [0.01-0.02] | 0.04 [0.03-0.04] |  | -1.95 [-2.06 to -1.83] |
| Sultanate of Oman | 0.02 [0.02-0.02] | 0.13 [0.11-0.16] |  | 0.01 [0.01-0.02] | 0.03 [0.02-0.03] |  | -4.69 [-4.87 to -4.51] |
| Republic of Djibouti | 0.01 [0.01-0.02] | 0.48 [0.41-0.56] |  | 0.01 [0.01-0.02] | 0.13 [0.11-0.16] |  | -4.07 [-4.54 to -3.59] |
| New Zealand | 0.01 [0-0.01] | 0.01 [0.01-0.02] |  | 0.01 [0.01-0.01] | 0.01 [0.01-0.02] |  | -1.15 [-1.31 to -0.98] |
| Barbados | 0.01 [0.01-0.02] | 0.47 [0.38-0.58] |  | 0.01 [0.01-0.01] | 0.23 [0.18-0.29] |  | -2.13 [-2.35 to -1.91] |
| Syrian Arab Republic | 0.04 [0.03-0.05] | 0.05 [0.04-0.06] |  | 0.01 [0.01-0.01] | 0.01 [0-0.01] |  | -6.41 [-6.66 to -6.16] |
| American Samoa | 0.01 [0.01-0.01] | 2.67 [2.22-3.18] |  | 0.01 [0.01-0.01] | 1.71 [1.45-2.02] |  | -1.29 [-1.36 to -1.23] |
| Tuvalu | 0.02 [0.01-0.02] | 19.99 [16.95-23.94] |  | 0.01 [0.01-0.01] | 7.09 [6.05-8.42] |  | -2.9 [-3.1 to -2.71] |
| Lebanese Republic | 0.02 [0.02-0.03] | 0.09 [0.07-0.1] |  | 0.01 [0.01-0.01] | 0.01 [0.01-0.01] |  | -6.63 [-6.69 to -6.56] |
| Democratic Republic of Sao Tome and Principe | 0.02 [0.01-0.02] | 1.93 [1.64-2.25] |  | 0.01 [0.01-0.01] | 0.6 [0.51-0.7] |  | -3.86 [-4.04 to -3.69] |
| Kingdom of Eswatini | 0.02 [0.01-0.02] | 0.29 [0.24-0.34] |  | 0.01 [0.01-0.01] | 0.08 [0.06-0.09] |  | -3.65 [-4.45 to -2.85] |
| Kingdom of Tonga | 0.01 [0.01-0.01] | 1.45 [1.22-1.7] |  | 0.01 [0.01-0.01] | 0.79 [0.67-0.93] |  | -1.83 [-1.9 to -1.76] |
| Northern Mariana Islands | 0.01 [0.01-0.01] | 2.18 [1.82-2.62] |  | 0.01 [0.01-0.01] | 1.31 [1.11-1.57] |  | -1.33 [-1.56 to -1.11] |
| Commonwealth of the Bahamas | 0.01 [0.01-0.01] | 0.37 [0.31-0.44] |  | 0.01 [0.01-0.01] | 0.19 [0.16-0.23] |  | -2.09 [-2.32 to -1.87] |
| Kingdom of Bahrain | 0.01 [0.01-0.01] | 0.17 [0.14-0.2] |  | 0.01 [0.01-0.01] | 0.05 [0.04-0.06] |  | -4.06 [-4.15 to -3.98] |
| Republic of Palau | 0.01 [0.01-0.01] | 4.92 [4.23-5.77] |  | 0.01 [0.01-0.01] | 2.86 [2.48-3.35] |  | -1.68 [-1.72 to -1.64] |
| Democratic People's Republic of Korea | 0 [0-0] | 0 [0-0] |  | 0 [0-0] | 0 [0-0] |  | NA |
| Georgia | 0 [0-0] | 0 [0-0] |  | 0 [0-0] | 0 [0-0] |  | NA |
| Mongolia | 0 [0-0] | 0 [0-0] |  | 0 [0-0] | 0 [0-0] |  | NA |
| Turkmenistan | 0 [0-0] | 0 [0-0] |  | 0 [0-0] | 0 [0-0] |  | NA |
| Bosnia and Herzegovina | 0 [0-0] | 0 [0-0] |  | 0 [0-0] | 0 [0-0] |  | NA |
| Hungary | 0 [0-0] | 0 [0-0] |  | 0 [0-0] | 0 [0-0] |  | NA |
| North Macedonia | 0 [0-0] | 0 [0-0] |  | 0 [0-0] | 0 [0-0] |  | NA |
| Montenegro | 0 [0-0] | 0 [0-0] |  | 0 [0-0] | 0 [0-0] |  | NA |
| Romania | 0 [0-0] | 0 [0-0] |  | 0 [0-0] | 0 [0-0] |  | NA |
| Republic of Moldova | 0 [0-0] | 0 [0-0] |  | 0 [0-0] | 0 [0-0] |  | NA |
| Russian Federation | 0 [0-0] | 0 [0-0] |  | 0 [0-0] | 0 [0-0] |  | NA |
| Ukraine | 0 [0-0] | 0 [0-0] |  | 0 [0-0] | 0 [0-0] |  | NA |
| Brunei Darussalam | 0 [0-0] | 0.13 [0.1-0.16] |  | 0 [0-0] | 0.07 [0.06-0.09] |  | -1.89 [-2.06 to -1.72] |
| Australia | 0 [0-0] | 0 [0-0] |  | 0 [0-0] | 0 [0-0] |  | NA |
| Ireland | 0 [0-0] | 0 [0-0] |  | 0 [0-0] | 0 [0-0] |  | NA |
| Canada | 0 [0-0] | 0 [0-0] |  | 0 [0-0] | 0 [0-0] |  | NA |
| United States of America | 0 [0-0] | 0 [0-0] |  | 0 [0-0] | 0 [0-0] |  | NA |
| Antigua and Barbuda | 0 [0-0] | 0 [0-0] |  | 0 [0-0] | 0 [0-0] |  | NA |
| Palestine | 0 [0-0] | 0 [0-0] |  | 0 [0-0] | 0 [0-0] |  | NA |
| Bermuda | 0 [0-0] | 0 [0-0] |  | 0 [0-0] | 0 [0-0] |  | NA |
| Cook Islands | 0 [0-0] | 2.02 [1.7-2.4] |  | 0 [0-0] | 0.84 [0.71-1] |  | -2.69 [-2.79 to -2.59] |
| Greenland | 0 [0-0] | 0 [0-0] |  | 0 [0-0] | 0 [0-0] |  | NA |
| Puerto Rico | 0 [0-0] | 0 [0-0] |  | 0 [0-0] | 0 [0-0] |  | NA |
| Saint Kitts and Nevis | 0 [0-0.01] | 1.32 [1.12-1.57] |  | 0 [0-0] | 0.48 [0.4-0.58] |  | -3.12 [-3.43 to -2.81] |
| Tokelau | 0 [0-0] | 3.91 [3.31-4.65] |  | 0 [0-0] | 1.5 [1.25-1.81] |  | -2.97 [-3.03 to -2.91] |
| United States Virgin Islands | 0 [0-0] | 0 [0-0] |  | 0 [0-0] | 0 [0-0] |  | NA |
| Commonwealth of Dominica | 0 [0-0.01] | 0.74 [0.62-0.87] |  | 0 [0-0] | 0.43 [0.36-0.51] |  | -1.43 [-1.67 to -1.19] |
| Republic of Nauru | 0 [0-0.01] | 5.53 [4.65-6.6] |  | 0 [0-0] | 2.87 [2.44-3.4] |  | -1.9 [-2.46 to -1.34] |
| Republic of Niue | 0 [0-0] | 2.75 [2.33-3.22] |  | 0 [0-0] | 1.33 [1.13-1.56] |  | -2.29 [-2.32 to -2.27] |
| Republic of Bulgaria | 0 [0-0] | 0 [0-0] |  | 0 [0-0] | 0 [0-0] |  | NA |
| Taiwan (Province of China) | 0 [0-0] | 0 [0-0] |  | 0 [0-0] | 0 [0-0] |  | NA |
| Republic of Armenia | 0 [0-0] | 0 [0-0] |  | 0 [0-0] | 0 [0-0] |  | NA |
| Kyrgyz Republic | 0 [0-0] | 0 [0-0] |  | 0 [0-0] | 0 [0-0] |  | NA |
| Republic of Tajikistan | 0 [0-0] | 0 [0-0] |  | 0 [0-0] | 0 [0-0] |  | NA |
| Republic of Uzbekistan | 0 [0-0] | 0 [0-0] |  | 0 [0-0] | 0 [0-0] |  | NA |
| Republic of Azerbaijan | 0 [0-0] | 0 [0-0] |  | 0 [0-0] | 0 [0-0] |  | NA |
| Republic of Albania | 0 [0-0] | 0 [0-0] |  | 0 [0-0] | 0 [0-0] |  | NA |
| Slovak Republic | 0 [0-0] | 0 [0-0] |  | 0 [0-0] | 0 [0-0] |  | NA |
| Czech Republic | 0 [0-0] | 0 [0-0] |  | 0 [0-0] | 0 [0-0] |  | NA |
| Republic of Belarus | 0 [0-0] | 0 [0-0] |  | 0 [0-0] | 0 [0-0] |  | NA |
| Republic of Poland | 0 [0-0] | 0 [0-0] |  | 0 [0-0] | 0 [0-0] |  | NA |
| Republic of Serbia | 0 [0-0] | 0 [0-0] |  | 0 [0-0] | 0 [0-0] |  | NA |
| Republic of Estonia | 0 [0-0] | 0 [0-0] |  | 0 [0-0] | 0 [0-0] |  | NA |
| Republic of Croatia | 0 [0-0] | 0 [0-0] |  | 0 [0-0] | 0 [0-0] |  | NA |
| Republic of Lithuania | 0 [0-0] | 0 [0-0] |  | 0 [0-0] | 0 [0-0] |  | NA |
| Republic of Finland | 0 [0-0] | 0 [0-0] |  | 0 [0-0] | 0 [0-0] |  | NA |
| Republic of Slovenia | 0 [0-0] | 0 [0-0] |  | 0 [0-0] | 0 [0-0] |  | NA |
| Federal Republic of Germany | 0 [0-0] | 0 [0-0] |  | 0 [0-0] | 0 [0-0] |  | NA |
| French Republic | 0 [0-0] | 0 [0-0] |  | 0 [0-0] | 0 [0-0] |  | NA |
| Hellenic Republic | 0 [0-0] | 0 [0-0] |  | 0 [0-0] | 0 [0-0] |  | NA |
| Republic of Malta | 0 [0-0] | 0 [0-0] |  | 0 [0-0] | 0 [0-0] |  | NA |
| Kingdom of Spain | 0 [0-0] | 0 [0-0] |  | 0 [0-0] | 0 [0-0] |  | NA |
| Portuguese Republic | 0 [0-0] | 0 [0-0] |  | 0 [0-0] | 0 [0-0] |  | NA |
| Republic of Cyprus | 0 [0-0] | 0 [0-0] |  | 0 [0-0] | 0 [0-0] |  | NA |
| Principality of Andorra | 0 [0-0] | 0 [0-0] |  | 0 [0-0] | 0 [0-0] |  | NA |
| United Kingdom of Great Britain and Northern Ireland | 0 [0-0] | 0 [0-0] |  | 0 [0-0] | 0 [0-0] |  | NA |
| Kingdom of Denmark | 0 [0-0] | 0 [0-0] |  | 0 [0-0] | 0 [0-0] |  | NA |
| Grand Duchy of Luxembourg | 0 [0-0] | 0 [0-0] |  | 0 [0-0] | 0 [0-0] |  | NA |
| State of Israel | 0 [0-0] | 0 [0-0] |  | 0 [0-0] | 0 [0-0] |  | NA |
| Kingdom of the Netherlands | 0 [0-0] | 0 [0-0] |  | 0 [0-0] | 0 [0-0] |  | NA |
| Republic of Latvia | 0 [0-0] | 0 [0-0] |  | 0 [0-0] | 0 [0-0] |  | NA |
| Kingdom of Belgium | 0 [0-0] | 0 [0-0] |  | 0 [0-0] | 0 [0-0] |  | NA |
| Republic of Austria | 0 [0-0] | 0 [0-0] |  | 0 [0-0] | 0 [0-0] |  | NA |
| Republic of Iceland | 0 [0-0] | 0 [0-0] |  | 0 [0-0] | 0 [0-0] |  | NA |
| Kingdom of Norway | 0 [0-0] | 0 [0-0] |  | 0 [0-0] | 0 [0-0] |  | NA |
| Republic of Italy | 0 [0-0] | 0 [0-0] |  | 0 [0-0] | 0 [0-0] |  | NA |
| Kingdom of Sweden | 0 [0-0] | 0 [0-0] |  | 0 [0-0] | 0 [0-0] |  | NA |
| Swiss Confederation | 0 [0-0] | 0 [0-0] |  | 0 [0-0] | 0 [0-0] |  | NA |
| People's Democratic Republic of Algeria | 0 [0-0] | 0 [0-0] |  | 0 [0-0] | 0 [0-0] |  | NA |
| Hashemite Kingdom of Jordan | 0 [0-0] | 0 [0-0] |  | 0 [0-0] | 0 [0-0] |  | NA |
| Republic of Turkey | 0 [0-0] | 0 [0-0] |  | 0 [0-0] | 0 [0-0] |  | NA |
| Principality of Monaco | 0 [0-0] | 0 [0-0] |  | 0 [0-0] | 0 [0-0] |  | NA |
| Republic of San Marino | 0 [0-0] | 0 [0-0] |  | 0 [0-0] | 0 [0-0] |  | NA |
| Grenada | 0.01 [0.01-0.01] | 0.86 [0.72-1.03] |  | 0 [0-0.01] | 0.38 [0.31-0.46] |  | -2.25 [-2.55 to -1.95] |
| Republic of Tunisia | 0.03 [0.03-0.04] | 0.05 [0.04-0.06] |  | 0 [0-0.01] | 0 [0-0] |  | -8.47 [-8.56 to -8.38] |
| Republic of Seychelles | 0.01 [0-0.01] | 0.86 [0.71-1.02] |  | 0 [0-0.01] | 0.39 [0.33-0.47] |  | -2.4 [-2.54 to -2.26] |

## Table S3 DALYs (Disability-Adjusted Life Years) of leprosy in 1990 and 2021 by 204 Countries and territories

C

|  | 1990 | |  | 2021 | |  | 1990-2021 |
| --- | --- | --- | --- | --- | --- | --- | --- |
| **Countries and territories** | **DALY cases No. *102 (95% UI)** | **ASDR per 100,000 No. (95% UI)** |  | **DALY cases No. *102 (95% UI)** | **ASDR per 100,000 No. (95% UI)** |  | **EAPC of ASPR No. (95% CI)** |
| Lao People's Democratic Republic | 0.46 [0.29-0.7] | 1.77 [1.13-2.65] |  | 5.83 [3.74-8.75] | 0.42 [0.27-0.63] |  | -5.84 [-6.02 to -5.66] |
| Malaysia | 0.31 [0.19-0.48] | 0.24 [0.15-0.36] |  | 4.45 [2.58-6.85] | 0.02 [0.01-0.04] |  | -3.82 [-3.99 to -3.66] |
| Solomon Islands | 0.04 [0.02-0.06] | 1.99 [1.29-2.89] |  | 4.28 [2.74-6.43] | 0.66 [0.41-1] |  | -2.74 [-2.92 to -2.57] |
| Brunei Darussalam | 0 [0-0] | 0.02 [0.01-0.03] |  | 3.64 [2.24-5.43] | 0.67 [0.41-1.01] |  | -2.54 [-2.79 to -2.28] |
| Japan | 0.01 [0-0.02] | NA |  | 3.33 [2.05-4.99] | 0.2 [0.12-0.29] |  | NA |
| Republic of Korea | 0.35 [0.22-0.52] | 0.09 [0.06-0.14] |  | 2.72 [1.68-4.03] | 0.5 [0.31-0.74] |  | -3.92 [-4.38 to -3.47] |
| New Zealand | 0 [0-0] | NA |  | 2.29 [1.48-3.33] | 1.36 [0.88-2] |  | NA |
| Barbados | 0.01 [0-0.01] | 0.25 [0.16-0.38] |  | 2.18 [1.42-3.14] | 1.32 [0.87-1.87] |  | -2.18 [-2.38 to -1.97] |
| Belize | 0.01 [0-0.01] | 0.53 [0.32-0.8] |  | 17.15 [11.04-25.03] | 0.61 [0.39-0.89] |  | -2.4 [-2.52 to -2.28] |
| Dominican Republic | 0.2 [0.13-0.31] | 0.43 [0.27-0.63] |  | 100.13 [65.14-147.54] | 0.74 [0.48-1.09] |  | -2.88 [-3.29 to -2.46] |
| Grenada | 0 [0-0] | 0.41 [0.24-0.61] |  | 1.92 [1.23-2.94] | 0.53 [0.34-0.8] |  | -2.45 [-2.76 to -2.15] |
| Jamaica | 0.04 [0.02-0.06] | 0.2 [0.12-0.31] |  | 1.59 [0.98-2.46] | 0.15 [0.09-0.23] |  | -2.23 [-2.45 to -2.01] |
| Saint Lucia | 0.01 [0.01-0.02] | 1.12 [0.71-1.67] |  | 1.47 [0.9-2.18] | 0.55 [0.34-0.82] |  | -2.56 [-2.85 to -2.28] |
| Saint Vincent and the Grenadines | 0 [0-0] | 0.38 [0.23-0.57] |  | 1.39 [0.84-2.12] | 0.54 [0.33-0.82] |  | -2.17 [-2.35 to -1.98] |
| Syrian Arab Republic | 0.04 [0.02-0.06] | 0.05 [0.03-0.08] |  | 1.24 [0.77-1.9] | 0.13 [0.08-0.2] |  | -7.36 [-7.54 to -7.18] |
| United Arab Emirates | 0.05 [0.03-0.07] | 0.38 [0.23-0.57] |  | 0.95 [0.61-1.45] | 0.56 [0.36-0.84] |  | -4.12 [-4.36 to -3.88] |
| Central African Republic | 0.49 [0.31-0.73] | 3.07 [1.93-4.53] |  | 0.95 [0.58-1.44] | 0.53 [0.33-0.79] |  | -5.34 [-6.04 to -4.64] |
| Democratic Republic of the Congo | 7.01 [4.47-10.07] | 3.27 [2.12-4.78] |  | 0.92 [0.58-1.34] | 1.65 [1.05-2.41] |  | -5.01 [-5.77 to -4.25] |
| United Republic of Tanzania | 2.12 [1.34-3.13] | 1.46 [0.93-2.13] |  | 0.71 [0.45-1.06] | 0.68 [0.42-1.01] |  | -2.47 [-3.02 to -1.91] |
| Burkina Faso | 0.78 [0.49-1.17] | 1.45 [0.91-2.17] |  | 0.67 [0.42-1] | 0.24 [0.15-0.35] |  | -3.66 [-3.89 to -3.43] |
| American Samoa | 0 [0-0.01] | 1.18 [0.77-1.74] |  | 0.65 [0.41-0.97] | 0.53 [0.33-0.81] |  | -1.76 [-1.84 to -1.68] |
| Cook Islands | 0 [0-0] | 1.36 [0.85-2.07] |  | 0.63 [0.4-0.95] | 0.12 [0.07-0.17] |  | -2.82 [-2.9 to -2.73] |
| Guam | 0.01 [0.01-0.02] | 1.29 [0.79-1.92] |  | 0.62 [0.39-0.95] | 0.47 [0.29-0.72] |  | -1.62 [-1.84 to -1.39] |
| Saint Kitts and Nevis | 0 [0-0] | 0.73 [0.46-1.1] |  | 0.59 [0.37-0.9] | 0.07 [0.04-0.11] |  | -3.4 [-3.82 to -2.98] |
| Tokelau | 0 [0-0] | 1.82 [1.15-2.64] |  | 0.55 [0.33-0.85] | 0.24 [0.14-0.36] |  | -3.29 [-3.34 to -3.24] |
| Tuvalu | 0.01 [0-0.01] | 7.91 [5.14-11.73] |  | 0.53 [0.34-0.77] | 0.81 [0.52-1.17] |  | -3.51 [-3.66 to -3.36] |
| Republic of India | 138.59 [90.91-206.08] | 2.29 [1.51-3.35] |  | 0.52 [0.32-0.78] | 0.15 [0.1-0.23] |  | -3.53 [-3.77 to -3.28] |
| Federative Republic of Brazil | 20.51 [13.13-30.22] | 1.85 [1.19-2.69] |  | 0.5 [0.32-0.74] | 0.59 [0.37-0.87] |  | -0.85 [-1.16 to -0.53] |
| People's Republic of Bangladesh | 13.48 [8.52-19.87] | 2.11 [1.36-3.11] |  | 0.47 [0.3-0.71] | 0.64 [0.41-0.96] |  | -6.27 [-6.38 to -6.16] |
| Republic of Indonesia | 13.06 [8.53-19.14] | 0.99 [0.64-1.45] |  | 0.47 [0.28-0.72] | 0.04 [0.02-0.05] |  | -0.94 [-1.23 to -0.65] |
| People's Republic of China | 8.9 [5.47-13.66] | 0.09 [0.05-0.13] |  | 0.43 [0.27-0.65] | 0.14 [0.09-0.22] |  | -4.64 [-4.83 to -4.44] |
| Federal Democratic Republic of Ethiopia | 8.51 [5.55-12.44] | 3.14 [2.01-4.5] |  | 0.43 [0.26-0.66] | 0.18 [0.11-0.28] |  | -5.3 [-5.48 to -5.12] |
| Republic of the Union of Myanmar | 5.91 [3.78-8.79] | 2.04 [1.3-2.98] |  | 0.43 [0.26-0.64] | 0.55 [0.34-0.84] |  | -4.6 [-4.99 to -4.21] |
| Federal Republic of Nigeria | 5.15 [3.34-7.67] | 0.9 [0.58-1.33] |  | 0.41 [0.25-0.62] | 0.54 [0.34-0.82] |  | -2.6 [-2.84 to -2.36] |
| Federal Democratic Republic of Nepal | 4.17 [2.62-6.4] | 3.34 [2.14-5.01] |  | 0.38 [0.25-0.56] | 0.51 [0.32-0.75] |  | -6.59 [-7.05 to -6.13] |
| Islamic Republic of Pakistan | 2.46 [1.47-3.78] | 0.34 [0.2-0.52] |  | 0.38 [0.23-0.57] | 0.25 [0.16-0.38] |  | -2.09 [-2.27 to -1.9] |
| Republic of Angola | 2.42 [1.57-3.62] | 4.24 [2.74-6.14] |  | 0.38 [0.22-0.58] | 0.04 [0.03-0.06] |  | -7 [-7.54 to -6.46] |
| Socialist Republic of Viet Nam | 2.36 [1.44-3.58] | 0.49 [0.29-0.74] |  | 0.37 [0.23-0.56] | 0.32 [0.19-0.49] |  | -4.01 [-4.11 to -3.9] |
| Republic of Mozambique | 2.32 [1.5-3.37] | 2.94 [1.93-4.21] |  | 0.37 [0.22-0.55] | 0.35 [0.22-0.53] |  | -3.18 [-3.65 to -2.7] |
| Democratic Socialist Republic of Sri Lanka | 1.87 [1.16-2.83] | 1.37 [0.87-2.06] |  | 0.36 [0.22-0.56] | 0.19 [0.12-0.3] |  | -2.33 [-2.51 to -2.15] |
| Kingdom of Thailand | 1.82 [1.13-2.76] | 0.39 [0.24-0.6] |  | 0.3 [0.19-0.46] | 0.56 [0.34-0.84] |  | -3.73 [-3.85 to -3.6] |
| Republic of Madagascar | 1.78 [1.1-2.66] | 2.64 [1.65-3.89] |  | 0.28 [0.17-0.42] | 0.13 [0.08-0.2] |  | -2.32 [-2.86 to -1.78] |
| Republic of C么te d'Ivoire | 1.12 [0.7-1.71] | 1.76 [1.12-2.64] |  | 0.27 [0.16-0.4] | 0.16 [0.1-0.24] |  | -2.87 [-3.29 to -2.45] |
| Republic of South Sudan | 1.11 [0.7-1.63] | 3.33 [2.08-4.84] |  | 0.26 [0.16-0.4] | 0.05 [0.03-0.08] |  | -0.84 [-1.48 to -0.21] |
| Republic of Sudan | 1.08 [0.68-1.57] | 0.9 [0.57-1.33] |  | 0.26 [0.15-0.39] | 0.05 [0.03-0.07] |  | -2.96 [-4.03 to -1.88] |
| Republic of the Philippines | 1.05 [0.66-1.6] | 0.25 [0.16-0.37] |  | 0.25 [0.15-0.4] | 0.08 [0.05-0.12] |  | -0.68 [-0.69 to -0.66] |
| Republic of Colombia | 0.85 [0.53-1.31] | 0.37 [0.23-0.58] |  | 0.23 [0.14-0.36] | 0.7 [0.42-1.05] |  | -3.49 [-3.72 to -3.27] |
| Republic of the Niger | 0.82 [0.52-1.22] | 2.02 [1.28-2.95] |  | 0.23 [0.13-0.34] | 0.03 [0.02-0.04] |  | -4.46 [-4.86 to -4.07] |
| Arab Republic of Egypt | 0.78 [0.48-1.18] | 0.21 [0.13-0.32] |  | 0.21 [0.13-0.32] | 0.38 [0.23-0.58] |  | -3.2 [-3.47 to -2.93] |
| Kingdom of Cambodia | 0.74 [0.46-1.11] | 1.2 [0.76-1.79] |  | 0.2 [0.12-0.3] | 0.59 [0.37-0.9] |  | -5.42 [-5.74 to -5.1] |
| Republic of Guinea | 0.71 [0.44-1.06] | 1.84 [1.15-2.73] |  | 0.2 [0.12-0.3] | 0.15 [0.09-0.24] |  | -3.68 [-4.24 to -3.12] |
| Republic of Uganda | 0.7 [0.43-1.06] | 0.77 [0.48-1.16] |  | 0.2 [0.12-0.3] | 0.16 [0.1-0.23] |  | -3.94 [-4.23 to -3.64] |
| Republic of Malawi | 0.66 [0.41-1] | 1.21 [0.75-1.81] |  | 0.18 [0.11-0.28] | 0.16 [0.1-0.24] |  | -4.13 [-4.34 to -3.92] |
| Republic of Ghana | 0.57 [0.34-0.9] | 0.65 [0.39-1.04] |  | 0.18 [0.11-0.27] | 0.29 [0.18-0.44] |  | -3.95 [-4.06 to -3.84] |
| Republic of Senegal | 0.55 [0.34-0.82] | 1.3 [0.83-1.93] |  | 0.17 [0.11-0.26] | 0.44 [0.28-0.66] |  | -4.11 [-4.29 to -3.94] |
| Republic of Burundi | 0.54 [0.34-0.78] | 1.73 [1.09-2.51] |  | 0.17 [0.11-0.25] | 0.16 [0.1-0.24] |  | -3.64 [-4.08 to -3.19] |
| Republic of Benin | 0.5 [0.33-0.74] | 1.93 [1.24-2.82] |  | 0.16 [0.1-0.24] | 0.17 [0.1-0.25] |  | -4.13 [-4.75 to -3.51] |
| Bolivarian Republic of Venezuela | 0.48 [0.3-0.71] | 0.37 [0.23-0.57] |  | 0.13 [0.08-0.21] | 0.07 [0.04-0.11] |  | -2.9 [-3.14 to -2.66] |
| Republic of Paraguay | 0.47 [0.29-0.7] | 1.73 [1.07-2.59] |  | 0.12 [0.07-0.18] | 0.12 [0.07-0.18] |  | -2.3 [-2.42 to -2.17] |
| Republic of Chad | 0.47 [0.3-0.69] | 1.36 [0.87-2.02] |  | 0.11 [0.07-0.17] | 0.14 [0.09-0.22] |  | -2.73 [-3.22 to -2.24] |
| Federal Republic of Somalia | 0.47 [0.28-0.69] | 1.15 [0.71-1.62] |  | 0.11 [0.07-0.17] | 0.07 [0.04-0.11] |  | -1.59 [-2.03 to -1.15] |
| Republic of Sierra Leone | 0.45 [0.29-0.69] | 1.76 [1.12-2.66] |  | 0.11 [0.07-0.16] | 1.07 [0.68-1.59] |  | -3.72 [-4.35 to -3.08] |
| Republic of the Congo | 0.4 [0.25-0.59] | 2.84 [1.8-4.11] |  | 0.1 [0.06-0.16] | 0.09 [0.06-0.14] |  | -6.39 [-6.82 to -5.96] |
| Republic of Cameroon | 0.4 [0.24-0.6] | 0.66 [0.4-0.99] |  | 0.1 [0.06-0.16] | 0.11 [0.07-0.17] |  | -4.16 [-4.47 to -3.84] |
| Republic of Rwanda | 0.39 [0.25-0.58] | 0.97 [0.6-1.44] |  | 0.1 [0.06-0.15] | 0.36 [0.22-0.54] |  | -7.38 [-7.69 to -7.06] |
| Republic of Liberia | 0.38 [0.24-0.56] | 2.61 [1.67-3.86] |  | 0.09 [0.06-0.14] | 0.09 [0.05-0.13] |  | -4.95 [-5.13 to -4.77] |
| Republic of Cuba | 0.36 [0.21-0.54] | 0.34 [0.2-0.51] |  | 0.08 [0.05-0.13] | 0.02 [0.01-0.04] |  | -2.2 [-2.45 to -1.95] |
| Independent State of Papua New Guinea | 0.33 [0.21-0.5] | 1.27 [0.8-1.91] |  | 0.07 [0.04-0.11] | 0.04 [0.02-0.07] |  | -2.22 [-2.28 to -2.17] |
| Republic of Mali | 0.33 [0.2-0.51] | 0.64 [0.4-0.97] |  | 0.07 [0.04-0.1] | 0.02 [0.01-0.03] |  | -4.68 [-4.77 to -4.58] |
| United Mexican States | 0.33 [0.2-0.5] | 0.06 [0.04-0.09] |  | 0.06 [0.04-0.09] | 0.46 [0.28-0.69] |  | -1.57 [-1.77 to -1.38] |
| Republic of Haiti | 0.32 [0.2-0.49] | 0.79 [0.49-1.16] |  | 0.05 [0.03-0.08] | 0.12 [0.07-0.18] |  | -4.67 [-5.04 to -4.3] |
| Argentine Republic | 0.29 [0.18-0.45] | 0.09 [0.06-0.14] |  | 0.05 [0.03-0.08] | 0.71 [0.44-1.06] |  | -1.31 [-1.49 to -1.13] |
| Republic of Guatemala | 0.29 [0.18-0.43] | 0.61 [0.38-0.92] |  | 0.05 [0.03-0.08] | 0.85 [0.52-1.32] |  | -4.06 [-4.52 to -3.6] |
| Republic of Zambia | 0.29 [0.18-0.44] | 0.68 [0.42-1.04] |  | 0.05 [0.03-0.07] | 0.41 [0.24-0.64] |  | -4.84 [-5.31 to -4.36] |
| Republic of Yemen | 0.25 [0.15-0.38] | 0.35 [0.22-0.54] |  | 0.05 [0.03-0.07] | 0.01 [0.01-0.02] |  | -3.37 [-3.66 to -3.08] |
| Republic of Kenya | 0.24 [0.15-0.36] | 0.19 [0.12-0.29] |  | 0.05 [0.03-0.07] | 0.09 [0.06-0.14] |  | -0.38 [-0.52 to -0.24] |
| Islamic Republic of Mauritania | 0.23 [0.15-0.34] | 1.87 [1.2-2.75] |  | 0.04 [0.03-0.07] | 0.24 [0.14-0.37] |  | -5.23 [-5.51 to -4.95] |
| Togolese Republic | 0.22 [0.13-0.32] | 1.16 [0.69-1.71] |  | 0.04 [0.03-0.07] | 0.25 [0.15-0.39] |  | -3.58 [-3.93 to -3.24] |
| Republic of South Africa | 0.21 [0.13-0.33] | 0.08 [0.05-0.12] |  | 0.04 [0.03-0.06] | 0.3 [0.18-0.45] |  | -1.81 [-1.95 to -1.68] |
| Plurinational State of Bolivia | 0.2 [0.12-0.32] | 0.5 [0.29-0.76] |  | 0.04 [0.02-0.06] | 0.77 [0.47-1.16] |  | -5.45 [-5.68 to -5.22] |
| Republic of Peru | 0.2 [0.12-0.31] | 0.14 [0.08-0.21] |  | 0.04 [0.02-0.06] | 0.41 [0.25-0.62] |  | -5.83 [-6.15 to -5.51] |
| Gabonese Republic | 0.16 [0.1-0.24] | 2.46 [1.54-3.66] |  | 0.04 [0.02-0.06] | 1.69 [1.08-2.49] |  | -5.22 [-5.38 to -5.06] |
| Democratic Republic of Timor-Leste | 0.15 [0.09-0.21] | 3.21 [2.05-4.67] |  | 0.03 [0.02-0.05] | 0.1 [0.06-0.15] |  | -3.78 [-4.39 to -3.16] |
| Republic of Ecuador | 0.13 [0.08-0.2] | 0.2 [0.12-0.3] |  | 0.03 [0.02-0.05] | 0.05 [0.03-0.08] |  | -4.63 [-4.97 to -4.28] |
| Kingdom of Morocco | 0.13 [0.08-0.2] | 0.07 [0.04-0.11] |  | 0.03 [0.02-0.05] | 0.01 [0.01-0.02] |  | -4.47 [-4.57 to -4.37] |
| Republic of Kazakhstan | 0.13 [0.08-0.2] | 0.09 [0.05-0.14] |  | 0.03 [0.02-0.05] | 0.17 [0.11-0.26] |  | -1.27 [-1.62 to -0.92] |
| Republic of Guinea-Bissau | 0.1 [0.07-0.15] | 1.92 [1.22-2.79] |  | 0.03 [0.02-0.05] | 3.25 [2.06-4.76] |  | -4.95 [-5.31 to -4.59] |
| Islamic Republic of Iran | 0.1 [0.06-0.16] | 0.03 [0.02-0.05] |  | 0.03 [0.02-0.04] | 0.29 [0.17-0.45] |  | 1.99 [1.3 to 2.67] |
| Republic of Honduras | 0.1 [0.06-0.15] | 0.37 [0.22-0.57] |  | 0.03 [0.02-0.04] | 0.41 [0.25-0.62] |  | -3.22 [-3.47 to -2.97] |
| State of Eritrea | 0.1 [0.06-0.15] | 0.51 [0.3-0.78] |  | 0.02 [0.01-0.04] | 0.04 [0.02-0.06] |  | -4.36 [-4.51 to -4.2] |
| Republic of Equatorial Guinea | 0.09 [0.06-0.14] | 3.71 [2.39-5.47] |  | 0.02 [0.01-0.03] | 0.29 [0.18-0.45] |  | -8.55 [-9.04 to -8.05] |
| Republic of Iraq | 0.09 [0.05-0.14] | 0.09 [0.05-0.13] |  | 0.02 [0.01-0.03] | 2.31 [1.53-3.5] |  | -5.9 [-6.16 to -5.64] |
| Republic of Zimbabwe | 0.09 [0.05-0.14] | 0.16 [0.1-0.24] |  | 0.02 [0.01-0.03] | 1.41 [0.89-2.07] |  | 0.22 [-0.31 to 0.75] |
| Republic of El Salvador | 0.08 [0.05-0.12] | 0.22 [0.14-0.34] |  | 0.02 [0.01-0.03] | 0.05 [0.03-0.08] |  | -4.63 [-5.13 to -4.13] |
| Republic of Guyana | 0.07 [0.04-0.1] | 1.34 [0.84-1.99] |  | 0.02 [0.01-0.03] | 0.14 [0.09-0.21] |  | -1.25 [-1.7 to -0.79] |
| Kingdom of Bhutan | 0.07 [0.04-0.11] | 1.85 [1.17-2.83] |  | 0.02 [0.01-0.02] | 0.08 [0.05-0.12] |  | -5.96 [-6.08 to -5.85] |
| Islamic Republic of Afghanistan | 0.06 [0.04-0.1] | 0.09 [0.05-0.13] |  | 0.01 [0-0.03] | NA |  | -2.77 [-4.21 to -1.3] |
| Union of the Comoros | 0.06 [0.04-0.09] | 2.31 [1.45-3.34] |  | 0.01 [0-0.01] | 0.12 [0.07-0.19] |  | -2.85 [-3.09 to -2.6] |
| Kingdom of Saudi Arabia | 0.05 [0.03-0.08] | 0.06 [0.03-0.09] |  | 0.01 [0-0.01] | NA |  | -7.86 [-8.15 to -7.56] |
| Republic of Trinidad and Tobago | 0.05 [0.03-0.07] | 0.51 [0.31-0.76] |  | 0.01 [0-0.01] | 0.01 [0.01-0.02] |  | -2.64 [-2.9 to -2.37] |
| Republic of the Gambia | 0.05 [0.03-0.07] | 0.92 [0.57-1.34] |  | 0.01 [0-0.01] | 0.09 [0.05-0.14] |  | -3.83 [-4.11 to -3.56] |
| Republic of Chile | 0.05 [0.03-0.07] | 0.04 [0.02-0.06] |  | 0.01 [0-0.01] | 0.5 [0.31-0.77] |  | -3.33 [-3.55 to -3.11] |
| Republic of Fiji | 0.05 [0.03-0.07] | 0.85 [0.52-1.28] |  | 0.01 [0-0.01] | 0.01 [0.01-0.02] |  | -2.21 [-2.28 to -2.15] |
| Republic of Costa Rica | 0.04 [0.03-0.07] | 0.21 [0.13-0.31] |  | 0.01 [0-0.01] | 0.89 [0.55-1.32] |  | -2.59 [-2.72 to -2.47] |
| Republic of Mauritius | 0.04 [0.03-0.07] | 0.47 [0.29-0.7] |  | 0.01 [0-0.01] | 0.01 [0.01-0.02] |  | -1.68 [-1.82 to -1.55] |
| Republic of Namibia | 0.04 [0.03-0.06] | 0.49 [0.31-0.73] |  | 0.01 [0-0.01] | 0.02 [0.01-0.04] |  | -3.28 [-3.65 to -2.9] |
| Republic of Tunisia | 0.04 [0.02-0.06] | 0.07 [0.04-0.11] |  | 0.01 [0.01-0.03] | NA |  | -9.63 [-9.74 to -9.52] |
| Federated States of Micronesia | 0.04 [0.02-0.05] | 5.68 [3.7-8.56] |  | 0.01 [0.01-0.02] | 0.47 [0.28-0.7] |  | -2.81 [-2.93 to -2.69] |
| Republic of Kiribati | 0.04 [0.02-0.05] | 7.34 [4.71-10.59] |  | 0.01 [0.01-0.02] | 0.77 [0.48-1.15] |  | -1.88 [-2.21 to -1.56] |
| Republic of Nicaragua | 0.03 [0.02-0.05] | 0.16 [0.1-0.25] |  | 0.01 [0.01-0.02] | 0.02 [0.01-0.03] |  | -4.26 [-4.37 to -4.15] |
| Independent State of Samoa | 0.03 [0.02-0.05] | 3.11 [2.01-4.56] |  | 0.01 [0.01-0.02] | 0.19 [0.11-0.3] |  | -2.17 [-2.27 to -2.07] |
| Republic of Vanuatu | 0.03 [0.02-0.04] | 3.18 [2.07-4.58] |  | 0.01 [0.01-0.02] | 0.03 [0.02-0.04] |  | -1.94 [-2.04 to -1.84] |
| Lebanese Republic | 0.03 [0.02-0.04] | 0.11 [0.07-0.17] |  | 0.01 [0.01-0.02] | 0.15 [0.09-0.22] |  | -7.66 [-7.87 to -7.44] |
| Republic of Suriname | 0.03 [0.02-0.04] | 0.91 [0.55-1.35] |  | 0.01 [0.01-0.01] | 0.25 [0.16-0.39] |  | -2.5 [-2.57 to -2.43] |
| Republic of Panama | 0.03 [0.02-0.04] | 0.15 [0.09-0.22] |  | 0.01 [0.01-0.01] | 0.22 [0.13-0.33] |  | -3.14 [-3.38 to -2.9] |
| Kingdom of Lesotho | 0.02 [0.01-0.03] | 0.22 [0.14-0.32] |  | 0.01 [0.01-0.01] | 0.17 [0.1-0.26] |  | -1.07 [-1.59 to -0.55] |
| Republic of Botswana | 0.02 [0.01-0.03] | 0.24 [0.15-0.37] |  | 0 [0-0] | 0.01 [0-0.01] |  | -3.63 [-4.11 to -3.15] |
| State of Libya | 0.02 [0.01-0.03] | 0.07 [0.04-0.11] |  | 0 [0-0] | NA |  | -4.72 [-4.89 to -4.55] |
| Kingdom of Eswatini | 0.02 [0.01-0.02] | 0.38 [0.23-0.57] |  | 0 [0-0] | 0.17 [0.1-0.26] |  | -3.93 [-4.61 to -3.25] |
| Republic of Cabo Verde | 0.01 [0.01-0.02] | 0.64 [0.38-0.98] |  | 0 [0-0] | 0.18 [0.11-0.27] |  | -4.17 [-4.36 to -3.99] |
| State of Kuwait | 0.01 [0.01-0.02] | 0.12 [0.07-0.18] |  | 0 [0-0] | 0.65 [0.4-0.98] |  | -4.3 [-4.55 to -4.04] |
| Democratic Republic of Sao Tome and Principe | 0.01 [0.01-0.02] | 1.66 [1.07-2.46] |  | 0 [0-0] | 0.55 [0.34-0.85] |  | -3.98 [-4.17 to -3.78] |
| Republic of Djibouti | 0.01 [0.01-0.02] | 0.52 [0.3-0.8] |  | 0 [0-0] | 0.23 [0.14-0.35] |  | -4.04 [-4.52 to -3.56] |
| Sultanate of Oman | 0.01 [0.01-0.02] | 0.1 [0.06-0.16] |  | 0 [0-0] | 0.63 [0.4-0.95] |  | -6.25 [-6.56 to -5.94] |
| Kingdom of Tonga | 0.01 [0.01-0.02] | 1.81 [1.16-2.69] |  | 0 [0-0] | 2.32 [1.48-3.45] |  | -2.11 [-2.17 to -2.05] |
| Commonwealth of the Bahamas | 0.01 [0.01-0.01] | 0.44 [0.27-0.66] |  | 0 [0-0] | 0.28 [0.17-0.43] |  | -2.22 [-2.49 to -1.96] |
| Republic of Maldives | 0.01 [0.01-0.01] | 0.67 [0.41-1.03] |  | 0 [0-0] | 0.45 [0.28-0.68] |  | -4.41 [-4.77 to -4.04] |
| Eastern Republic of Uruguay | 0.01 [0-0.01] | 0.02 [0.01-0.03] |  | 0 [0-0] | 1.15 [0.72-1.68] |  | -1.41 [-1.59 to -1.23] |
| Kingdom of Bahrain | 0 [0-0.01] | 0.11 [0.06-0.17] |  | 0 [0-0] | 0.2 [0.12-0.3] |  | -5.22 [-5.25 to -5.18] |
| State of Qatar | 0 [0-0.01] | 0.1 [0.06-0.15] |  | 0 [0-0] | NA |  | -4.86 [-4.99 to -4.73] |
| Commonwealth of Dominica | 0 [0-0] | 0.52 [0.31-0.79] |  | 0 [0-0] | 0.93 [0.58-1.38] |  | -1.73 [-1.97 to -1.49] |
| Republic of the Marshall Islands | 0 [0-0] | 1.16 [0.72-1.82] |  | 0 [0-0] | 0.83 [0.52-1.26] |  | -1.78 [-2.29 to -1.27] |
| Northern Mariana Islands | 0 [0-0] | 0.86 [0.53-1.32] |  | 0 [0-0.01] | NA |  | -1.7 [-1.83 to -1.57] |
| Republic of Palau | 0 [0-0] | 2.25 [1.43-3.3] |  | 0 [0-0.01] | 0.02 [0.01-0.03] |  | -2.07 [-2.16 to -1.98] |
| Republic of Seychelles | 0 [0-0] | 0.41 [0.25-0.61] |  | 0 [0-0.01] | 0.72 [0.43-1.16] |  | -2.16 [-2.27 to -2.05] |
| Republic of Singapore | 0 [0-0] | 0.01 [0-0.01] |  |  |  |  | -4.84 [-5.02 to -4.65] |
| Republic of Nauru | 0 [0-0] | 2.14 [1.35-3.15] |  |  |  |  | -2.59 [-3.07 to -2.11] |
| Republic of Niue | 0 [0-0] | 1.83 [1.17-2.68] |  |  |  |  | -2.5 [-2.52 to -2.48] |

## Table S4 Age-standardized Prevalence rates of leprosy with slope index of inequality and concentration index analysis by global

| Year | Slope Index | CI Lower | CI Upper | Concentration Index | CI Lower Concentration Index | CI Upper Concentration Index |
| --- | --- | --- | --- | --- | --- | --- |
| 1990 | -16.2589 | -19.0094 | -13.5084 | 0.4891567 | 0.4491567 | 0.5291567 |
| 2021 | -5.132128 | -6.12305 | -4.14121 | 0.3558553 | 0.3258553 | 0.3858553 |

## Table S5 Age-standardized DALYs rates of leprosy with slope index of inequality and concentration index analysis by global

| Year | Slope Index | CI Lower | CI Upper | Concentration Index | CI Lower Concentration Index | CI Upper Concentration Index |
| --- | --- | --- | --- | --- | --- | --- |
| 1990 | -1.8014685 | -2.08943 | -1.51351 | 0.4921284 | 0.4521284 | 0.5321284 |
| 2021 | -0.5392745 | -0.65441 | -0.42414 | 0.3534827 | 0.3234827 | 0.3834827 |

## Table S6 Age-standardized DALYs rates of leprosy with slope index of inequality and concentration index analysis by global

| Year | Slope Index | CI Lower | CI Upper | Concentration Index | CI Lower Concentration Index | CI Upper Concentration Index |
| --- | --- | --- | --- | --- | --- | --- |
| 1990 | -0.8946326 | -1.0416 | -0.74766 | 0.4909291 | 0.4509291 | 0.5309291 |
| 2021 | -0.2887542 | -0.34164 | -0.23587 | 0.3609153 | 0.3309153 | 0.3909153 |
